# Supplementary material for: A model for the evolution of prokaryotic DNA restriction-modification systems based upon the structural malleability of Type I restriction-modification enzymes
Source: PubMed Central journal article supplement (PMC6158711; doi:10.1093/nar/gky760), 2018-08-28
Supplement: gky760_supplemental_files.pdf [file gky760_supplemental_files.pdf]

# A model for the evolution of prokaryotic DNA restriction-modification systems based upon the structural malleability of Type I restriction-modification enzymes.

Edward K.M. Bower, Laurie P. Cooper, Gareth A. Roberts, John H. White, Yvette Luyten, Richard D. Morgan, David T.F. Dryden

## Supplementary Information

**Table S1. Amino acid sequences for the HsdR, HsdS and HsdS used in this work.**

|                                                                                                  |             |             |             |             |            |             |             |  |  |  |  |
|--------------------------------------------------------------------------------------------------|-------------|-------------|-------------|-------------|------------|-------------|-------------|--|--|--|--|
| HsdR subunit (SauN315ORF189P 929 aa)                                                             |             |             |             |             |            |             |             |  |  |  |  |
| MAYQSEYALE                                                                                       | NEMMNQLEQL  | GYERVITIRDN | KQLLDNFRTI  | LNERHADKLE  | GNPLTDKEFQ | RLLTMDIGKS  | IFESARILRD  |  |  |  |  |
| KLPLRRDDES                                                                                       | EIYLSFLDKK  | SWCKNKFQVT  | NQVSVEDTYK  | ARYDVTLIN   | GLPLVQVELK | RRGIDINEAF  | NQVKRYRKQN  |  |  |  |  |
| YTGLFRYIQM                                                                                       | FIISNGVETR  | YFSNNDSELL  | KSHMFYWSDK  | QNNRINTLQS  | FAESFMRPCQ | LAKMISRYMI  | LEINSTRILMA |  |  |  |  |
| MRPYQVYAVE                                                                                       | ALIQQATETG  | NNGYVWHTTG  | SGKTLTSFKA  | SQILSQDDI   | KKVIFLVDRK | DLDSQTEEF   | NKFAKGAVDK  |  |  |  |  |
| TFNTSQLVRQ                                                                                       | LNDKSLPLIV  | TTIQKMAKAI  | QGNAHLLEQY  | KTNKVFIID   | ECHRSQFGDM | HRLVKQHFKN  | AQYFGFTGTP  |  |  |  |  |
| RFPENSSQDG                                                                                       | RTTADIFGRC  | LHTYLIRDAI  | HGDNVLGFSV  | DYINTFKNKA  | LKAEDNSMVE | AIDTEEVWLA  | DKRVELVTRH  |  |  |  |  |
| IINNHDKYTR                                                                                       | NRQYSIFTV   | QSIHALIKY   | ETFKRLNKKL  | EQPLTIAGIF  | TFKPNEDDRD | GEVPHYHREK  | LEIMISDYNK  |  |  |  |  |
| KFETNFSTDT                                                                                       | TNEYFNHISK  | NVKKGVKDSK  | IDILIVNMF   | LTGFDSKVLN  | TLYVDKNLMY | HDLIQAYSRT  | NRVEKESKPF  |  |  |  |  |
| GKIVNYRDLK                                                                                       | KETD DALRVF | SQTNDDTDL   | MRSYEEYKKE  | FMDAYRELKM  | IVPTPHMVDD | IQDEEELKRF  | VEAYRLLAKI  |  |  |  |  |
| ILRLKAFDEF                                                                                       | EFTIDEIGMD  | EQENEDYKSK  | YLAVYDQVKR  | ATAEKNKVSII | LNDIDFEIEM | MRNDTINVNY  | IMNILRQIDL  |  |  |  |  |
| EDKAEQRRNQ                                                                                       | EQIRRLDHA   | DDPTLRLLKR  | LIREFDINNVV | PSLNKDDDDID | QEYVNFESIK | KEAEFKGFAG  | ERSIDEQALK  |  |  |  |  |
| TISNDYQYSG                                                                                       | VVNP HHLKMM | IGDLPLKEKR  | KARKAIESFV  | AETTEKYGV   |            |             |             |  |  |  |  |
| HsdR subunit nucleotide sequence (SauN315ORF189P 2790 nt)                                        |             |             |             |             |            |             |             |  |  |  |  |
| ATGGCATACCAAAGTGAATACGCATTAGAAAATGAAATGATGAATCAACTGAACAATTTGGGTTACGAAAGAGTAACGATACGTTGATAATAA    |             |             |             |             |            |             |             |  |  |  |  |
| GCAATGCTTGATAATTTTAGAACGATTTTAAATGAGCGTCAATCGGACAAATTAGAAGGCAATCCCTTAACAGATAAAGAATTTCAACGTC      |             |             |             |             |            |             |             |  |  |  |  |
| TGTTAACGATGATTGATGGGAAAAGTATTTTCGAGAGTGCCCGTATTTTACGTGATAAATTACCACCTAGACGTGATGAGTCTGAGATT        |             |             |             |             |            |             |             |  |  |  |  |
| TATTTGTCGTTTTTAGATAAGAAAAGTTGGTGTAAAAATAAGTTTCAAGTGACGAATCAAGTATCTGTCGAGGATACATATAAAGCAGGTTA     |             |             |             |             |            |             |             |  |  |  |  |
| TGATGTAACGATATTAATCAACGGACTACCCCTTGTCCAAGTTGAATTGAAACGTCGAGGTATTGATATTAATGAGGCGTTTTAACCAAGTAA    |             |             |             |             |            |             |             |  |  |  |  |
| AACGTTACCGCACAAACAAAATACACAGGCTTATCCGCTACATACAAAATGTTTATCATTAGTAATGGTGTGAAACCGGATACCTTTTCTAAT    |             |             |             |             |            |             |             |  |  |  |  |
| AATGATAGCGAACTATTGAAGAGTCACATGTTTTATTGGAGTGATAAACAGAATAACCGAATCAATACATTACAATCATTGCTGAGTCGTT      |             |             |             |             |            |             |             |  |  |  |  |
| TATGAGACCCGTGCAATTAGCTAAGATGATATCGCGCTATATGATTATTAATGAAACAGATAGAATACTGATGGCAATGCGTCCGATCAAG      |             |             |             |             |            |             |             |  |  |  |  |
| TGTATGCGGTAGAAGCACTATTCAACAACGGACTGAGACAGGGAATAATGGATATGATGGCATAACAACGGAAGTGGTAAGACATTTGACT      |             |             |             |             |            |             |             |  |  |  |  |
| TCTTTTAAACGGAGTCAGATTATTACAGCAAGATGACATTAAGAAGATTTCTTTTGGTTGACCGTAAAGCTGGATGATCAACAGACA          |             |             |             |             |            |             |             |  |  |  |  |
| AGAGGAATTTAATAAATTTGCTAAGGGTGTCTAGACAAAACCTTTTAATACCTCGCAACTGGTACGCCAACTAAATGATAAAAGTTTCCAC      |             |             |             |             |            |             |             |  |  |  |  |
| TTATTGTAACGACGATTTCAAAAATGGCTAAAGCGATTCAAGGGAATGCCATTTATTAGAACAGTATAAAACGAAATAAGTTGATTTATT       |             |             |             |             |            |             |             |  |  |  |  |
| ATTGATGAGTGCATCGCAGTCAATTTGGTGACATGCATCGTCTAGTTAAACAACATTTCAAAAATGCCCAATACTTTGGATTCACTGGTAC      |             |             |             |             |            |             |             |  |  |  |  |
| GCCACGTTTTCCAGTACTGATTTTACAGTCAAGATGGTAGAACCACTGCGAGATTTTTCGTTAGATGCTTACATACGATTTTAAATGAGAGTGC   |             |             |             |             |            |             |             |  |  |  |  |
| TTCATGATGGTAATGTAATTTGGTTTCTCAGTTGACTATATTAATCTTTTAAAAATAAAGCTTTAAAAGCAGAAGATAACAGCATGGTTGAA     |             |             |             |             |            |             |             |  |  |  |  |
| GCAATTGATACGGAAGAAGTATGGTTAGCGGATAAACGTTGGAATTAGTAACACGACATATCATCAATAATCATGATAAATAACACGTA        |             |             |             |             |            |             |             |  |  |  |  |
| TCGTCAATATTCAAGTATATTACAGTCCAAAGTATTCACGCGCTTATTAATATTTAGAGACATTTAAGCGACTTAACAAAAGTTTGGAA        |             |             |             |             |            |             |             |  |  |  |  |
| AACCTTAAACGGAGTCTGGTATTATTACGTTTAAACCTAATGAAGATGATGCTGATGGTGAAGTGCCATATATCAACGTAAGAAAATTAGAG     |             |             |             |             |            |             |             |  |  |  |  |
| ATAATGATTAGTGATTATAATAAAAGTTTCGAGACGAATTTTCAACAGACACAATAATGAGTATTTAATCATATTTCAAAAACGTTAA         |             |             |             |             |            |             |             |  |  |  |  |
| AAAGGCGCTTAAAGATAGTAAAATTTGATATCTTAATCGTTGTTAAATATGTTCTTAACGTTTGTAGTAGTAAAGTACTGAACACTTTATATG    |             |             |             |             |            |             |             |  |  |  |  |
| TTGATAAGAATTTAATGTATCATGATTTAATCAAGCGTATTCACGTAACAATAGGGTTGAAAAGAATCAAAGCCATTTGGTAAAATTTGTA      |             |             |             |             |            |             |             |  |  |  |  |
| AACTATCGTGACTTGAAAATAAGAGACAGACGATGCCTGACGATTTCTCACAAAACAAATGATACGGATACGATTTTAAATGCGGATATGA      |             |             |             |             |            |             |             |  |  |  |  |
| AGAGTATAAAAAAGAATTTATGGACGCTTATCGTGAGCTTAAAATGATTGTGCCACACCACACATGGTTGATGACATTTCAAGATGAAGA       |             |             |             |             |            |             |             |  |  |  |  |
| AGCTAAAGCGCTTTGTTGAAGCTTATCGTTTATTAGCTAAAATAAATATTACGTTTAAAAGCATTGACGAGTTTGGTGTACAAATTGATGAA     |             |             |             |             |            |             |             |  |  |  |  |
| ATTGGAATGGATGAACAAGAGAATGAAGACTATAAAAAGTAAATATTAGCTGTGTACGATCAAGTAAAAGAGCGACGGCTGAGAAAATAA       |             |             |             |             |            |             |             |  |  |  |  |
| AGTATCCATTTAAATGATAATTGATTTCGAAATAGAAATGATGCGTAATGATACGATTAATGTGAATTAATATGAAATATATTGAGACAAA      |             |             |             |             |            |             |             |  |  |  |  |
| TTGATCTTGAAGACAAGCGGAACAACGTCGTAACCAAGAACAATTAGACGCATTTTAGATCATGCAGATGATCCGACATTTAGGTTAAAA       |             |             |             |             |            |             |             |  |  |  |  |
| CGAGATCTAATTAGAGAATTCATCGACAATGTTGTACCTTCTTAATAAAGGATGATGATATCGATCAAGAATATGTTAATTCGAAAGTAT       |             |             |             |             |            |             |             |  |  |  |  |
| TAAAAAGAAGCGGAGTTCAAAGGATTTGCTGGAGAGAGATCTATCGATGAACAAGCCCTAAAAACAATTTCAAATGACTACCAGTATAGTG      |             |             |             |             |            |             |             |  |  |  |  |
| GTGTTGTAACCCACATCACCTTAAAAAATGATTGGTATTGCCATTGAAAGAAAAGCGTAAAGCAAGAAAAGCCATTTGAATCTTTTCGTG       |             |             |             |             |            |             |             |  |  |  |  |
| GCAGAAACAACGAAAATACGGTGTG                                                                        |             |             |             |             |            |             |             |  |  |  |  |
| HsdM (M.SauSTORF499P 518 aa)                                                                     |             |             |             |             |            |             |             |  |  |  |  |
| MSITEKQRQQ                                                                                       | QAEHLHKKLWS | IANDLRGNMD  | ASEFRNYILG  | LIFYRFLSEK  | AEQEYADALS | GEDITYQEAW  | ADEEYREDLK  |  |  |  |  |
| AELIDQVGYF                                                                                       | IEPQDLFSAM  | IREIETQDFD  | IEHLATAIRK  | VETSTLGEES  | ENDFIGLFS  | MDLSSTRLGN  | NVKERTALIS  |  |  |  |  |
| KVMVNLDDLP                                                                                       | FVHSDMEIDM  | LGDAYEFLIG  | RFAATAGKKA  | GEFYTPQQVS  | KILAKIVTDG | KDKLRHVYDP  | TCGSGSLLLR  |  |  |  |  |
| VGKETQVYRY                                                                                       | FGQERNNTTY  | NLARNMMLLH  | DVRYENFDIR  | NDDTLENPAF  | LGHTFDVIA  | NPPYSAKWTA  | DSKFENDERF  |  |  |  |  |
| SGYGKLPKPS                                                                                       | KADFAFIQHM  | VHYLDDEGTM  | AVVLPHGVLV  | RGAAEVIRR   | YLIEEKNYLE | AVIGL PANIF | YGTSIPTCIL  |  |  |  |  |
| VFKCRQQDD                                                                                        | NVLFIDASND  | FEKGKNQNH   | SDAQRVERID  | TYRKRKETIDK | YSYSATLQEI | ADNDYNLNP   | RYVDTFEBEA  |  |  |  |  |
| PIDLDQVQQD                                                                                       | LKNIDKEIAE  | VEQEINAYLK  | ELGVLKDE    |             |            |             |             |  |  |  |  |
| HsdM nucleotide sequence (M.SauSTORF499P 1557 nt)                                                |             |             |             |             |            |             |             |  |  |  |  |
| ATGTCATTATTCGAAAACAACGTCAGCAACAAGCTGAATTACATAAAAAATTTATGGTCGATTGCGAATGATTTAAGAGGGAATATGGATGC     |             |             |             |             |            |             |             |  |  |  |  |
| GAGTGAATTCGTAATACATTTTAGGCTTGATTTTCTATCGCTTCTTATCTGAAAAGCGGAACAAGAATACGCAGATGCCTTGTCAGGTTG       |             |             |             |             |            |             |             |  |  |  |  |
| AAGACATCACGATCAAGAAGCATGGGCAGATGAAGAATACCGTGAAGACTTAAAAGCAGAATTAATTGATCAAGTTGGTTACTTTATTGAA      |             |             |             |             |            |             |             |  |  |  |  |
| CCGCAAGATTTATTCAGCGCGATGATTCGTGAAATGAAACGCAAGATTTTCGATATCGAACATCTAGCGACGGCAATTCGTAAGGTTGAAAC     |             |             |             |             |            |             |             |  |  |  |  |
| ATCAACATTTAGGTGAAGAAAGTGAATAAGCTTTATTCGGACTATTACGCGATATGGATTTGAGTTCAACGCGACTAGGTAAACAATGTCAAAG   |             |             |             |             |            |             |             |  |  |  |  |
| AAGTACTGCGTTAATCTCTAAAGTCAAGTCAAGTAAATCTTACGACTTACCATTGTTTACAGTATGAAATGATATGAAATGATGATGATGATGATG |             |             |             |             |            |             |             |  |  |  |  |
| TAGCAATTCCTTAAATGCGCGCTTTGCGGCGACAGCGGGTAAAAGAGCTGGCGAGTTCTATACACCACAACAAGTATCTAAGATACTGCGCAA    |             |             |             |             |            |             |             |  |  |  |  |
| GATTGTACAGACGGTAAAGATAAATACGTCATGTATATGACCAACATGTGGTTCAGGTTCACTTACTGTTACGTTGATGATGATGATGATGATG   |             |             |             |             |            |             |             |  |  |  |  |
| AAGTGTATCGTTATTTCCGGTCAAGAAGCTAACAATACCACATACAACCTAGCGCGCATGAACATGTTTATCATGATGATGATGATGATGATG    |             |             |             |             |            |             |             |  |  |  |  |
| TTGATATACGTAATGATGACAGTGGAAAATCCAGCCTTTTAGGCCATACATTTGATGCGGTTATTGCGAACCCACCATACAGTCCGAA         |             |             |             |             |            |             |             |  |  |  |  |

ATGGACAGCAGATTCAAATTTGAAAATGACGAACGATTCAGCGGATACGGCAAGCTTGCGCCAAAGTCTAAAGCAGACTTTGCCTTTATTC  
AACACATGGTACATTACCTAGATGATGAAGGTACCATGGCAGTTGTACTACCGCATGGTGTCTTATCCGTGGGGCTGCAGAAGCGTCATT  
CGTCGTTACTTAATTGAAGAAAAGAACTACCTAGAAAGCCGTGATTGGCTTACCAGCGAATATTTTCTATGGGACAAGTATTCACACATGTAT  
TTTAGTATTTAAAAAATGTCGCCAACCAAGACGACAACGTATTATTATCGATGCATCCAATGATTTTAAAAAGGAAAAAATCAAACCATT  
TAAGCGACGCCCAAGTCGAACGCATTATAGACACATATAAGCGTAAAGAAACAATCGATAAATATAGCTACAGCGCGACATTACAAGAGATT  
GCCGATAACGATTAACTTAAACATTCGGAGATATGTCGATACATTCGAAGAAGAAGCGCCAATTGATTTAGATCAAGTCCAACAAGATTT  
GAAAAATATCGACAAGAAATCGCAGAAGTTGAACAAGAAATCAATGCATACCTGAAAGAAGCTTGGGGTGTGAAAGATGAG

HsdS (S.SauSTORF499P with His tag recognising ACCNNNNRRTGA)  
MSNTQKKNVP ELRFPGEFE WEEKKLGEFA GKVTQKNVDK KYIETLTNSA ELGIISQKDY FDKEISNIDN IKKYYVVEEN  
DFVYNPRMSN YAPFGVNRN KLGKGVMSF LYTVFKIQNI DLNFIEFYFK SSKWYRFMAL NGDSGARADR FSIKDRTFME  
MPLHIPCMDE QIKIGQFFSK LDRQIELEEQ KLELLQQQKK GYMOKIFSQE LRFKDENGKD YPEWEETIK EIAQINTGKK  
DTKDAITNGS YDFYVRSPV YKINTFSYEG EAILTVGDGV GVGVFHYVN GKFDYHQRVY KISDFKNYYG LLLFYFYSQ  
FLKETKKYSA KTSVDSVRKD MIANMKVPRP IYIEQKKIGQ FIKRVDNKT IQKQVIELLK QRKKSLLQKM FIPGGSHHHH HH  
HsdS nucleotide sequence (S.SauSTORF499P with His tag)  
ATGAGTAATACACAAAAGAAAAATGTGCCAGAGTTGAGATTCCTGGGTTTGAAGCGAATGGGAAGAGAAGAAGCTAGGTGAGTTTCTGG  
TAAAGTTACCAAAAAATGTTGATAAAAAATATATTGAGACATTAATAATTCATCTGAGTTAGGTATCATATCTCAAAGGATTATTTG  
ACAAAGAAATTTGCAATATAGATAATATTAAGTACTATGTAGTTGAAGAGAATGATTTTGTATAACCTAGAAATGCTAATTATGCT  
CCATTTGGACCAGTAAATAGAAATAAGTTAGGAAAAAAGGGTTCATGTCACCTCTTATACTGTGTTAAAATTCAAAACATTGATTTAAA  
CTTTATTGAGTTTATTTTAAATCTTCAAATGGTATAGATTTATGGCATTAAACGGTGATTTCAGGTGCTCGAGCAGATAGGTTTCTATTA  
AAGATAGGACATTTATGGAATGCCACTTCATATCCCATGTATGGATGAACAAATAAAAAATCGGTCAGTTCTTCAGCAAACTGACCCGACAA  
ATTGAATTAGAAGAACAAAACTTGAATTACTTCAACAACAGAAAAAGGCTATATGCAGAAAACTTCTCGCAAGAATTGCGATTTAAGA  
TGAGAATGGTAAAGATTATCCGGAGTGGGAAGAACTACTATAAAAGAAATGCTCAAATTAACACTGGAAAGAAAGATACAAAAGATGCCA  
TTACTAATGGGAGTTATGATTTTACGTTAGATCTCCGATAGTTTATAAAATTAATACTTTTAGTTATGAAGGAGAGGCTATTTAACTGTA  
GGAGATGGAGTTGGCGTAGTAAAGTTTCCACTATGTAATGGGAATTTGATTATCATCAAAGAGTATACAAAATATCTGACTTTAAGAA  
TTATTATGGATTATGTTATTTTATTTTACAAAACCTTTTAAAGAAACAAAGAAATATAGTGCGAAGACATCAGTTGATTCAGTTA  
GAAAAGACATGATTGCTAATATGAAAGTACCGCTCTATTTATATAGAACAAAAAATCGGTCATTCATTAAGAGTAGACACAAA  
ACAAAATTCAGAAACAAGTATTGAATTACTTAAACAACGCAAAAAGTCACTTCAAAAAGATGTTTATTCCTGGGGGATCCCATCATCA  
TCATCATCATT

**Table S2. Oligonucleotide sequences for fusion of nuclease domain of *hsdR* to 5' end of *hsdM* and the amino acid sequences of the part of HsdR fused to HsdM. Nucleotide sequences in bold are part of the gene coding sequence.**

| Fusion Name           | PCR oligonucleotide name                                                                                                                                                                                                                                                                                                    | Nucleotide Sequence                                                           |
|-----------------------|-----------------------------------------------------------------------------------------------------------------------------------------------------------------------------------------------------------------------------------------------------------------------------------------------------------------------------|-------------------------------------------------------------------------------|
| RM_EB_1<br>(not used) | Mu50nucendalpha-CC398-1TS-                                                                                                                                                                                                                                                                                                  | 5' <b>GC</b> ACTTATTCAACAAGCGACTATGTCTATTACTGAAAAACAACG 3'                    |
|                       | Mu50nucendalpha-CC398-1BS-                                                                                                                                                                                                                                                                                                  | 5' CGTTGTTTTTCAGTAATAGACAT <b>AGTCGCTTGTGAAATAAGTGC</b> 3'                    |
| RM_EB_2               | Mu50nucendcoil-CC398-1TS                                                                                                                                                                                                                                                                                                    | 5' <b>CG</b> ACTGAGACAGGGAATAATATGTCTATTACTGAAAAACAACG 3'                     |
|                       | Mu50nucendalpha-CC398-1BS                                                                                                                                                                                                                                                                                                   | 5' CGTTGTTTTTCAGTAATAGACAT <b>ATTATTCCTGTCTCAGTCG</b> 3'                      |
| RM_EB_3               | Mu50nuclease- CC398-1TS                                                                                                                                                                                                                                                                                                     | 5' <b>CATT</b> GC <b>TGAGTCGTTT</b> TATGAGAA <b>TG</b> CTATTACTGAAAAACAACG 3' |
|                       | Mu50nuclease- CC398-1BS                                                                                                                                                                                                                                                                                                     | 5' CGTTGTTTTTCAGTAATAGACAT <b>TCTCATAA</b> CGACTCAGCA <b>ATG</b> 3'           |
| RM_EB_4               | RM_EB_7_TS                                                                                                                                                                                                                                                                                                                  | 5' <b>CAGA</b> ATA <b>ACC</b> GAATCA <b>ATACA</b> ATGTCTATTACTGAAAAACAACG 3'  |
|                       | RM_EB_7_BS                                                                                                                                                                                                                                                                                                                  | 5' CGTTGTTTTTCAGTAATAGACAT <b>TGTATTGATTCGGTTATCTCG</b> 3'                    |
| RM_EB_5               | RM_EB_8_TS                                                                                                                                                                                                                                                                                                                  | 5' <b>CAAT</b> CAT <b>TTGCTGAGTCGTT</b> TATGTCTATTACTGAAAAACAACG 3'           |
|                       | RM_EB_8_BS                                                                                                                                                                                                                                                                                                                  | 5' CGTTGTTTTTCAGTAATAGACAT <b>AA</b> CGACTCAGCA <b>AAATGATTG</b> 3'           |
| RM_EB_6               | RM_EB_9_TS                                                                                                                                                                                                                                                                                                                  | 5' <b>CCCT</b> GT <b>CAATTAGCTAAGATGATA</b> ATGTCTATTACTGAAAAACAACG 3'        |
|                       | RM_EB_9_BS                                                                                                                                                                                                                                                                                                                  | 5' CGTTGTTTTTCAGTAATAGACAT <b>TATCATCTTAGCTAATTGACAGGG</b> 3'                 |
| RM_EB_7               | RM_EB_10_TS                                                                                                                                                                                                                                                                                                                 | 5' <b>CTGAT</b> GGCA <b>ATGCGTCCG</b> TATATGTCTATTACTGAAAAACAACG 3'           |
|                       | RM_EB_10_BS                                                                                                                                                                                                                                                                                                                 | 5' CGTTGTTTTTCAGTAATAGACAT <b>TACGGACGCATTGCCATCAG</b> 3'                     |
| RM_EB_8               | RM_EB_11_TS                                                                                                                                                                                                                                                                                                                 | 5' <b>CCGCT</b> ACAT <b>ACAATGTTT</b> TATGTCTATTACTGAAAAACAACG 3'             |
|                       | RM_EB_11_BS                                                                                                                                                                                                                                                                                                                 | 5' CGTTGTTTTTCAGTAATAGACAT <b>AAACATTTGTATGTAGCGG</b> 3'                      |
| RM_EB_9               | RM_EB_12_TS                                                                                                                                                                                                                                                                                                                 | 5' <b>GGTGT</b> GAA <b>ACGCGATACTTTT</b> TCTATGTCTATTACTGAAAAACAACG 3'        |
|                       | RM_EB_12_BS                                                                                                                                                                                                                                                                                                                 | 5' CGTTGTTTTTCAGTAATAGACAT <b>AGAAAAGTATCGCGTTTCAACACC</b> 3'                 |
| RM_EB_10              | RM_EB_13_TS                                                                                                                                                                                                                                                                                                                 | 5' <b>GGCATA</b> CA <b>ACTGGAAGTGGT</b> ATGTCTATTACTGAAAAACAACG 3'            |
|                       | RM_EB_13_BS                                                                                                                                                                                                                                                                                                                 | 5' CGTTGTTTTTCAGTAATAGACAT <b>ACCAC</b> TCCAG <b>TTGTATGCC</b> 3'             |
| RM_EB_11              | RM_EB_14_TS                                                                                                                                                                                                                                                                                                                 | 5' <b>CGGAGT</b> CAG <b>ATTTATCA</b> ATGTCTATTACTGAAAAACAACG 3'               |
|                       | RM_EB_14_BS                                                                                                                                                                                                                                                                                                                 | 5' CGTTGTTTTTCAGTAATAGACAT <b>TGATAAAATCTGACTCGC</b> 3'                       |
| Fusion Name           | Amino acid sequence from HsdR                                                                                                                                                                                                                                                                                               |                                                                               |
| RM_EB_2               | MAYQSEYALE NEMMNQLEQL GYERVTIRDN KQLLDNFRTI LNERHADKLE GNPLTDKEFQ RLLTMIDGKS IFESARILRD KLPLRRDDES EIYLSFLDKK SWCKNKFQVT NQVSVEDTYK ARYDVITILIN GLPLVQVELK RRGIDINEAF NQVKRYRKQN YTGLFRYIQM FIISNGVETR YFSNNDSELL KSHMFYWSDK QNNRINTLQS FAESFMRPCQ LAKMISRYMI INETDRILMA MRPYQVYAVE ALIQQATETG NN                           |                                                                               |
| RM_EB_3               | MAYQSEYALE NEMMNQLEQL GYERVTIRDN KQLLDNFRTI LNERHADKLE GNPLTDKEFQ RLLTMIDGKS IFESARILRD KLPLRRDDES EIYLSFLDKK SWCKNKFQVT NQVSVEDTYK ARYDVITILIN GLPLVQVELK RRGIDINEAF NQVKRYRKQN YTGLFRYIQM FIISNGVETR YFSNNDSELL KSHMFYWSDK QNNRINTLQS FAESFMR                                                                             |                                                                               |
| RM_EB_4               | MAYQSEYALE NEMMNQLEQL GYERVTIRDN KQLLDNFRTI LNERHADKLE GNPLTDKEFQ RLLTMIDGKS IFESARILRD KLPLRRDDES EIYLSFLDKK SWCKNKFQVT NQVSVEDTYK ARYDVITILIN GLPLVQVELK RRGIDINEAF NQVKRYRKQN YTGLFRYIQM FIISNGVETR YFSNNDSELL KSHMFYWSDK QNNRINT                                                                                        |                                                                               |
| RM_EB_5               | MAYQSEYALE NEMMNQLEQL GYERVTIRDN KQLLDNFRTI LNERHADKLE GNPLTDKEFQ RLLTMIDGKS IFESARILRD KLPLRRDDES EIYLSFLDKK SWCKNKFQVT NQVSVEDTYK ARYDVITILIN GLPLVQVELK RRGIDINEAF NQVKRYRKQN YTGLFRYIQM FIISNGVETR YFSNNDSELL KSHMFYWSDK QNNRINTLQS FAESF                                                                               |                                                                               |
| RM_EB_6               | MAYQSEYALE NEMMNQLEQL GYERVTIRDN KQLLDNFRTI LNERHADKLE GNPLTDKEFQ RLLTMIDGKS IFESARILRD KLPLRRDDES EIYLSFLDKK SWCKNKFQVT NQVSVEDTYK ARYDVITILIN GLPLVQVELK RRGIDINEAF NQVKRYRKQN YTGLFRYIQM FIISNGVETR YFSNNDSELL KSHMFYWSDK QNNRINTLQS FAESFMRPCQ LAKMI                                                                    |                                                                               |
| RM_EB_7               | MAYQSEYALE NEMMNQLEQL GYERVTIRDN KQLLDNFRTI LNERHADKLE GNPLTDKEFQ RLLTMIDGKS IFESARILRD KLPLRRDDES EIYLSFLDKK SWCKNKFQVT NQVSVEDTYK ARYDVITILIN GLPLVQVELK RRGIDINEAF NQVKRYRKQN YTGLFRYIQM FIISNGVETR YFSNNDSELL KSHMFYWSDK QNNRINTLQS FAESFMRPCQ LAKMISRYMI INETDRILMA MRP                                                |                                                                               |
| RM_EB_8               | MAYQSEYALE NEMMNQLEQL GYERVTIRDN KQLLDNFRTI LNERHADKLE GNPLTDKEFQ RLLTMIDGKS IFESARILRD KLPLRRDDES EIYLSFLDKK SWCKNKFQVT NQVSVEDTYK ARYDVITILIN GLPLVQVELK RRGIDINEAF NQVKRYRKQN YTGLFRYIQM F                                                                                                                               |                                                                               |
| RM_EB_9               | MAYQSEYALE NEMMNQLEQL GYERVTIRDN KQLLDNFRTI LNERHADKLE GNPLTDKEFQ RLLTMIDGKS IFESARILRD KLPLRRDDES EIYLSFLDKK SWCKNKFQVT NQVSVEDTYK ARYDVITILIN GLPLVQVELK RRGIDINEAF NQVKRYRKQN YTGLFRYIQM FIISNGVETR YFS                                                                                                                  |                                                                               |
| RM_EB_10              | MAYQSEYALE NEMMNQLEQL GYERVTIRDN KQLLDNFRTI LNERHADKLE GNPLTDKEFQ RLLTMIDGKS IFESARILRD KLPLRRDDES EIYLSFLDKK SWCKNKFQVT NQVSVEDTYK ARYDVITILIN GLPLVQVELK RRGIDINEAF NQVKRYRKQN YTGLFRYIQM FIISNGVETR YFSNNDSELL KSHMFYWSDK QNNRINTLQS FAESFMRPCQ LAKMISRYMI INETDRILMA MRPYQVYAVE ALIQQATETG NNGYVWHHTG SG                |                                                                               |
| RM_EB_11              | MAYQSEYALE NEMMNQLEQL GYERVTIRDN KQLLDNFRTI LNERHADKLE GNPLTDKEFQ RLLTMIDGKS IFESARILRD KLPLRRDDES EIYLSFLDKK SWCKNKFQVT NQVSVEDTYK ARYDVITILIN GLPLVQVELK RRGIDINEAF NQVKRYRKQN YTGLFRYIQM FIISNGVETR YFSNNDSELL KSHMFYWSDK QNNRINTLQS FAESFMRPCQ LAKMISRYMI INETDRILMA MRPYQVYAVE ALIQQATETG NNGYVWHHTG SGKTLTTSFKA SQILS |                                                                               |

**Table S3. Amino acid sequences for MS<sub>fus</sub>, 1/2S and M1/2S<sub>fus</sub>. The sequences derived from HsdS are underlined.**

|                      |                    |                    |                   |                    |                    |                    |                    |
|----------------------|--------------------|--------------------|-------------------|--------------------|--------------------|--------------------|--------------------|
| MS <sub>fus</sub>    |                    |                    |                   |                    |                    |                    |                    |
| MSITEKQRQQ           | QAE LHKKLWS        | IANDLRGNMD         | ASEFRNYILG        | LIFYRFLSEK         | AEQEYADALS         | GEDITYQEAW         | ADEEYREDLK         |
| AELIDQVGYF           | IEPQDLFSAM         | IREIETQDFD         | IEHLATAIRK        | VETSTLGEES         | ENDFIGLFS D        | MDLSSTR LGN        | NVKERTALIS         |
| KVMVNLDDLP           | FVHSDMEIDM         | LGDAYEFLIG         | RFAATAGKKA        | GEFYTPQQVS         | KILAKIVTDG         | KDKLRHVYDP         | TCGSGSLLLR         |
| VGKETQVYRY           | FGQERNNTTY         | NLARMNMLLH         | DVRYENFDIR        | NDDTLENPAF         | LGHTFD AVIA        | NPPYSAK WTA        | DSKFENDERF         |
| SGYGKLAPKS           | KADFAFIQHM         | VHYLDDEGTM         | AVVLP HGVLF       | RGAAEGVIRR         | YLIEEK NYLE        | AVIGLPANIF         | YGTSIPTCIL         |
| VFKKCRQ QDD          | NVLFIDASND         | FEKGKNQ NHL        | SDA QVERIID       | TYKRKETIDK         | YSYSATLQEI         | ADNDY NLNIP        | RYVDTFEEEA         |
| PIDLDQVQQD           | LKNIDKEIAE         | VEQEINAYLK         | ELGVLKDEMS        | NTQKKNVPEL         | RFPGFEGEWE         | EKKLG EFAGK        | VTQKNVDK KY        |
| <u>IETLTNSAEL</u>    | <u>GIISQKDYFD</u>  | <u>KEISNIDNIK</u>  | <u>KYYVVEENDF</u> | <u>VYNPRMSNYA</u>  | <u>PFGPVNRNKL</u>  | <u>GKKGVMSPLY</u>  | <u>TVFKIQNIDL</u>  |
| <u>NFIEFYFKSS</u>    | <u>KWYRFMALNG</u>  | <u>DSGARADRF S</u> | <u>IKDRTFMEMP</u> | <u>LHIPCMDEQI</u>  | <u>KIGQFFSKLD</u>  | <u>RQIELEE QKL</u> | <u>ELLQQQKKG Y</u> |
| <u>MQKIFSQELR</u>    | <u>FKDENGK DYP</u> | <u>EWEE TTIKEI</u> | <u>AQINTGKKDT</u> | <u>KDAITNGSYD</u>  | <u>FVVRSPIVYK</u>  | <u>INTFSYEGEA</u>  | <u>ILTVGDG VGV</u> |
| <u>GKVFHYVNGK</u>    | <u>FDYHQRVYKI</u>  | <u>SDFKNYYGLL</u>  | <u>LFYYFSQNFL</u> | <u>KETKKYS AKT</u> | <u>SVDSVRKDMI</u>  | <u>ANMKVPRPIY</u>  | <u>IEQKKIGQFI</u>  |
| <u>KRVDNKT KIQ</u>   | <u>KQVIELLKQR</u>  | <u>KKSLLQK MFI</u> | <u>PGGSHHHHHH</u> |                    |                    |                    |                    |
| HsdM                 |                    |                    |                   |                    |                    |                    |                    |
| MSITEKQRQQ           | QAE LHKKLWS        | IANDLRGNMD         | ASEFRNYILG        | LIFYRFLSEK         | AEQEYADALS         | GEDITYQEAW         | ADEEYREDLK         |
| AELIDQVGYF           | IEPQDLFSAM         | IREIETQDFD         | IEHLATAIRK        | VETSTLGEES         | ENDFIGLFS D        | MDLSSTR LGN        | NVKERTALIS         |
| KVMVNLDDLP           | FVHSDMEIDM         | LGDAYEFLIG         | RFAATAGKKA        | GEFYTPQQVS         | KILAKIVTDG         | KDKLRHVYDP         | TCGSGSLLLR         |
| VGKETQVYRY           | FGQERNNTTY         | NLARMNMLLH         | DVRYENFDIR        | NDDTLENPAF         | LGHTFD AVIA        | NPPYSAK WTA        | DSKFENDERF         |
| SGYGKLAPKS           | KADFAFIQHM         | VHYLDDEGTM         | AVVLP HGVLF       | RGAAEGVIRR         | YLIEEK NYLE        | AVIGLPANIF         | YGTSIPTCIL         |
| VFKKCRQ QDD          | NVLFIDASND         | FEKGKNQ NHL        | SDA QVERIID       | TYKRKETIDK         | YSYSATLQEI         | ADNDY NLNIP        | RYVDTFEEEA         |
| PIDLDQVQQD           | LKNIDKEIAE         | VEQEINAYLK         | ELGVLKDE          |                    |                    |                    |                    |
| 1/2S                 |                    |                    |                   |                    |                    |                    |                    |
| MS                   | NTQKKNVPEL         | RFPGFEGEWE         | EKKLG EFAGK       | VTQKNVDK KY        | <u>IETLTNSAEL</u>  | <u>GIISQKDYFD</u>  | <u>KEISNIDNIK</u>  |
|                      |                    |                    |                   |                    | <u>KYYVVEENDF</u>  | <u>VYNPRMSNYA</u>  | <u>PFGPVNRNKL</u>  |
|                      |                    |                    |                   |                    | <u>GKKGVMSPLY</u>  | <u>TVFKIQNIDL</u>  | <u>NFIEFYFKSS</u>  |
|                      |                    |                    |                   |                    | <u>KWYRFMALNG</u>  | <u>DSGARADRF S</u> | <u>IKDRTFMEMP</u>  |
|                      |                    |                    |                   |                    | <u>LHIPCMDEQI</u>  | <u>KIGQFFSKLD</u>  | <u>RQIELEE QKL</u> |
|                      |                    |                    |                   |                    | <u>ELLQQQKKG Y</u> | <u>MQKIFSQELR</u>  | <u>FKDENGK GSH</u> |
|                      |                    |                    |                   |                    | <u>HHHHH</u>       |                    |                    |
| M1/2S <sub>fus</sub> |                    |                    |                   |                    |                    |                    |                    |
| MSITEKQRQQ           | QAE LHKKLWS        | IANDLRGNMD         | ASEFRNYILG        | LIFYRFLSEK         | AEQEYADALS         | GEDITYQEAW         | ADEEYREDLK         |
| AELIDQVGYF           | IEPQDLFSAM         | IREIETQDFD         | IEHLATAIRK        | VETSTLGEES         | ENDFIGLFS D        | MDLSSTR LGN        | NVKERTALIS         |
| KVMVNLDDLP           | FVHSDMEIDM         | LGDAYEFLIG         | RFAATAGKKA        | GEFYTPQQVS         | KILAKIVTDG         | KDKLRHVYDP         | TCGSGSLLLR         |
| VGKETQVYRY           | FGQERNNTTY         | NLARMNMLLH         | DVRYENFDIR        | NDDTLENPAF         | LGHTFD AVIA        | NPPYSAK WTA        | DSKFENDERF         |
| SGYGKLAPKS           | KADFAFIQHM         | VHYLDDEGTM         | AVVLP HGVLF       | RGAAEGVIRR         | YLIEEK NYLE        | AVIGLPANIF         | YGTSIPTCIL         |
| VFKKCRQ QDD          | NVLFIDASND         | FEKGKNQ NHL        | SDA QVERIID       | TYKRKETIDK         | YSYSATLQEI         | ADNDY NLNIP        | RYVDTFEEEA         |
| PIDLDQVQQD           | LKNIDKEIAE         | VEQEINAYLK         | ELGVLKDEMS        | NTQKKNVPEL         | RFPGFEGEWE         | EKKLG EFAGK        | VTQKNVDK KY        |
| <u>IETLTNSAEL</u>    | <u>GIISQKDYFD</u>  | <u>KEISNIDNIK</u>  | <u>KYYVVEENDF</u> | <u>VYNPRMSNYA</u>  | <u>PFGPVNRNKL</u>  | <u>GKKGVMSPLY</u>  | <u>TVFKIQNIDL</u>  |
| <u>NFIEFYFKSS</u>    | <u>KWYRFMALNG</u>  | <u>DSGARADRF S</u> | <u>IKDRTFMEMP</u> | <u>LHIPCMDEQI</u>  | <u>KIGQFFSKLD</u>  | <u>RQIELEE QKL</u> | <u>ELLQQQKKG Y</u> |
| <u>MQKIFSQELR</u>    | <u>FKDENGK DGS</u> | <u>HHHHH</u>       |                   |                    |                    |                    |                    |

**Table S4. Nucleotide sequences inserted into pUC19 to make the “E” series of plasmids for the DNA cleavage assay.**

|                                                                                                                                                                                                                                                                                                                                                                                                                                                                                                                                                                                                                                                                                                                                                                                                                                                                                                                                                                                                                                                                                                                                                                                                                                                                                                                                                                                                                                                                                                                                                                                                                                                                                                                                                                                                                                                                                                                                                                                                                                                                                                                                                                                                                                                                                                                                                                                                                                                                                                                                                                                                                                                                                                                                                                             |
|-----------------------------------------------------------------------------------------------------------------------------------------------------------------------------------------------------------------------------------------------------------------------------------------------------------------------------------------------------------------------------------------------------------------------------------------------------------------------------------------------------------------------------------------------------------------------------------------------------------------------------------------------------------------------------------------------------------------------------------------------------------------------------------------------------------------------------------------------------------------------------------------------------------------------------------------------------------------------------------------------------------------------------------------------------------------------------------------------------------------------------------------------------------------------------------------------------------------------------------------------------------------------------------------------------------------------------------------------------------------------------------------------------------------------------------------------------------------------------------------------------------------------------------------------------------------------------------------------------------------------------------------------------------------------------------------------------------------------------------------------------------------------------------------------------------------------------------------------------------------------------------------------------------------------------------------------------------------------------------------------------------------------------------------------------------------------------------------------------------------------------------------------------------------------------------------------------------------------------------------------------------------------------------------------------------------------------------------------------------------------------------------------------------------------------------------------------------------------------------------------------------------------------------------------------------------------------------------------------------------------------------------------------------------------------------------------------------------------------------------------------------------------------|
| <p>CLONE E1</p> <p>GTGTTTCTCGAAAACAGGCAAAATCTTAAATGAAAGGGTTCTTGTTACTATGGGAATAGATATTTATTTGCGCAATTGATCCCGGTGTGTCAG<br/> CTGGTGGAAATAGTGGTATATAAGCCGGGTAATAGTCTTATTACTATCCCAATGCCACGCACGGCAAAGGGTATTTTTAACGTGTTTCAAAAA<br/> GTGAAGCGTTCCCGTAGCCCTGCAATATTCATTTAGCGCTCTTCGGTTCGTGGGGGTGACTCCGAGGCGGGAAAAGAAATTTAGAATAGCAAC<br/> TATGTTGGGAACTACAACCTTGTATGTTGTGCGCTCGTCTTGATATTCCTTTATTTCTGTGTGCGCTATTTCTGTTGGCAAAGTGGTT<br/> TAAATCTGAGGGAGAAAGGAGAGAAAAGAGGAAAAGAGGATAGAAAAGAAAAGTATCTGAATTATGCGATGAGCAATTCGCCCTTGCAAAC<br/> GTGAAATATGGAATAGTGACGCTATATGTATTTTGCCTTCGCACAGATGAAGATGATTTGTGATGTGCTATTTGTTTCAAGTAACATGCA<br/> GAACGAAAACACACAGAAATAGCATTTTCTCCCTCTGTTCCGACGATAGTATTAATTCGTAGAAAAGATATGGATTCAAAAGAAAACGAT<br/> CTAAAAACGCTCTAATTGAATCGGTGAAAGAATTGAGAAGCGCACAGAAGAGATTTGAGCGATTCCGGGAGAGATACAGAGAGAGAAAAGA<br/> AAAGCGGAAAAGAAAGTAGATGATATAATTTCTAAGCTGACGGACACGCAATAAGTTTATTTAAATTTAATTAACGTGTTTGTCTATTGCTA<br/> TGTTTCGATTAAAGTGCCTATATTTGCAGTGTAAAATTTGTCCGCCAACAAATTTAAAGATATTGCTTAAATAGCGTAAATGCCTCGGTTCTGT<br/> TGTTTGGCGGCACACGAAATCGGGCATTAAATTTAACTGTAATGATATGGAATTTCCGGTATTGATCAGAGAGAAAGTTTAGGATTTGA<br/> TTTTAAATATATGGTACTTTTGTGATCCTTTGTTTTGGCTAAAGATGTTGCTATTTGTATTGATTATGATTTGAGTAGCGTTAATAAAC<br/> TGGTGAACCTTGTAGATGATATGAAAAGGTACGGAACATTTATCCGACACTTGGAGGTAATCAAGAAGCTTGGTTTTAATGAAAGATGGT<br/> TTATACGAGGTGTTAATGCTAAGTAGAAAACCTATGGCAAAGCAATTTAAATCAAAAATAAAAAGAGATATTGAAAGATATACGCAGACATGG<br/> LONATATGCAACTGATAATTTATAGATCAGATATTAATAACCCAGATTTTGGAAATAGGACTATTAACATAAGGTAAGGAAAAGAGATCGG<br/> CAAGAATAGAGGCGGAAAAGAAAATGCAATACTTATGCACGTGAATAAACTTATACATCTACGGAGATAGCGAAAAGAGATAGGTTTTAAAA<br/> TCGGCAAACGAATTAATAAAAATACGAAATCAAGAAGATTTCAGTTTAAAGTAAATGGTACATGGGTATTGATTCTAAGTACTCTAATTG<br/> CGTTACGAAGAAGTGAAACAAGAAGTCTTTGATAGTGGAAAGGTTTATATATCATAGACGTTTCCAGCAGCTTGGGAGAGATTTTATATTA<br/> ACCTATTTCAAGTGAATTTAACTAAAGTTAAATAACGGTATTTCCGAAAGATTTTCCCGTTTTTATTTGCGTTAATTTAAAGTTTGTGCT<br/> TTAATTTGCAGCGTAGAAAATAAAAACAGTAGTAACAATAAAATCAATTAATTATGCAGGAAATTAACAAGAAATTAAGTGAACAGTCAGTAG<br/> AAAAGTTTTGGATAGACCGGAGTATAGAAAAGAGCTTCTATTTATTTGGGATGGCTTAAAAGAGCAACGGAAAAGGCTTCGTTTCAAAATA<br/> TTGCATCACGGAGGATTTCTAAAAGAAATAACAATAGATAGAGTAGATAAAAATGGATACGGATCAACTTATATCAGAATTTAAGCTGATACT<br/> TGACAGAAAAGAGTGTAGTTCCCTGCAAGTCTGAGGTAATTTATTTCCGATGTGTCGGGAAAGGTAATTTATGTTGGTTTACAAAAGTACGC<br/> AAGATGAAGCAAAAAGAAAATAACGATACCCGGGAAGGTAACAAAGACGGTAAGTTATCCATCTACATGGGGAGCTTAAACGAGTTTATGAA<br/> GAACAACGCAGGAAAATATATTTGCGGAGTTTACGGTATTAGAACCCTGATTTCTCATCTTCCGTTGGGATACACTTTAATACGTTG<br/> TTCCCAATTTTCAAAAAGGATGTGCGAAAATGGGTACAGGTGGAGCGAAGAAGAAACGGAGGCTTATATGCGTAGTATTTGCCCTATTACG<br/> ATGGTGAAGTGTAGATGTTGAACTGGTGAATAG</p>                                                                                       |
| <p>CLONE E2</p> <p>GTTGAAACTGGTGTAGTATAGAAAGGACTCAGTTAAAGTTACCGATTTAAGCAATAGCGAATTTGTCGAATACATAGAATTTTTAAAGCAGTT<br/> TGCGGCAGAGAATTTAGTATTTATATTTGAAGAACCAAAATAGATTTGTAAGATGAAAGAAAATGAAAGAAATGACTTTAGAGGAAAAGTTCAA<br/> TTTGATGTGCGAAGCATTAAAGCATACTCCGGGAAAATTTATACACGGGATATTACACGTTATGTATCACTTCAAGGAATTTGCATTTATCC<br/> ATCAGCTTTACCGCTTAAAATACCGGTTTACCGAATTTACCGAATTTAAATTTAGGAAAGGTTTAAATTTAGAAAAGGTAAGCTTTTCAAGGC<br/> GAATTAGATGTGAAAGATATGACAGCCGTAGAGTTTGTACGGCTTATAGACGAACGACTGCAAAAAGTATATTTGATGGCAAAGAGATTAAGA<br/> ATCTTGTCTTGTTCATTGACAGGAGTGTAGGTTTCAGTTCAGATCACATAATTTGATTTGCTATTGCAAAAAGAGAGATAAAAAGTTATGC<br/> AGTTGCCCGAACATTTGGCGGGTCTGTGAGTTTACATTAATAAAATAAAGTATCATGTTAAAAGACAATTTTGAATTAAGAGAGATTAAGTT<br/> CTTGAATAACGGGTTAGAGGTTGATTCAATGATTGCCGTTTGGTTTGGTTGAGCGTGAAGAAAACAAGACGTTTCAAGGCTTAAATGAGGTAAT<br/> ATCCGCATAGAGATTTAGGAATTTGGGCAAAATGAGCTTCCGTTTATACATAGTTGAATTTGATGGGAATAATGAATTTTAGGAACATCACCTAT<br/> TTGTCTGATTTGGCAAAAACAGACAATGAGTTAAGTAGACAAATCCATGAATATTTTGAACGCTTGTCTACCCGTTGCTCGCCATTAGCGGAGAT<br/> AGTTTACGATCCCGAAAAGAATAACAATCGTTTTCAAAATATATTTCCGAGCGTAGATTTATCCCGGTTGAAAATGCAAAACGAGCAAAAATTA<br/> TGTTGCGCGTGAAGGTTGAAATTTGAAATAGCACTACAAGATAGTTTGCAGGACTGAAAGATGAAATTTTCAAGTAAATTTTGGGTAAT<br/> AAGCGTGCACAATTTGGAGCTATTTCCGTTGAGACAGCAACGGCAGAACAGGACGATAGTTTACGCCCCGATGATGATTTAGAAGGTGACGATAC<br/> GTTTTTTGATGATGAAAGAGCAGAGCAGCCGGAGTTGATCAGAAGAAGATGTACACGATTTGATACGTTTGGAGAAAATAGATTTATGTTTAAAG<br/> AGGGGGTATAACCCCTTGTCTATTTAATAATAATTTGATATTTGAGCTTAAACAAGGATGAAATTTAAAACGGATGTTCCGAGAGGGTCA<br/> CGGACAGATGAGTAAAGGTTTCCCTCCGATATTTGAAATAGTGTAGGTTAAGGTTTAAAGTAAAGTAAAGTAAAGTAAAGTAAAGTAAAGTAAAGT<br/> CAGCCGTTTATATTTCCGATATTTAACGAGGGGATCGAACCCAAATGATTTGCGCATGATCCCGTAACATAAACATACTTTGTTTCAATTGC<br/> CATAATCGTTGGGAGCAGCTAACACCCGGGAAAGGATGCGGATATATCAAAAGTAAATTTAGAAAATAAAAAGTCCCTCAAAAAGGACAGTTT<br/> AAAATCGCAAAAAGAAATGAAATTTAGTAAAATTTGAATTTGATCTGGAAATGAAATTTATGATTAACCTAAATCTGTGGAATCAATAGTTAG<br/> ATATACAGATGATTTCCGTTGATATTTAACACAGTAGGTTAGATGATGCGGTTAAGGTTAAAGTTCAATTTAGGATCAATTAAGCACTAA<br/> GCGAAGGTAGCAAGATTGATTTCAATAGCAGGACTTATGGTTATCGTCTTTATTTGAAATTTACATATTTCAACATTAGCAAATTTATTTATCG<br/> TAATGAATTTAAACAAAATCGAATTTGATCGGGCGTGTTCGCGCTGATCCGCAAGTAAAACCTTCGATAACGGAGGAAAAGTATGTAATCTT<br/> TCTATCGCAACGAACGAAAGGGCATATAAACCGAGTAACGGTATCGAAGTTCCGGAAAACAGACTTTCATAATGTAACATTTCAAAGGTAA<br/> ATTGCTGAGATTTGCGGGCAGTATGTTACCAAGGGAATGGAGTTAATCACTAGAAAGGTAAGTTGCACTATGAAAATAACCCGATCAATA<br/> ACGTTGAAAAGAACTATTTCTGAGATCGTTGTTAGGCTATGACAGATGGGAAGAAAAGCAGGTTAGGGGAAACCAGCCGACACCCGAGGCAAC<br/> GGAAACCAACAGCCGACACCCGAGGTTATAGCGGTCAACAGCAACCGCCTCAGCAGATGTTTACGCAAAAATGATGATTTGCCGTTTTAATG<br/> TAGTTTATAAATTTGGGATGATATTTGCATCCCTTTTTTGTAAATACGTTTAAACTTAAAGTTTCCGTTGTAATATC</p> |
| <p>CLONE E3</p> <p>CTTAAAGTTTCGCTTGAATATCAAAATTAAGCCCTTATATTTGCAAGTGTCAAAGGAAAACAAAGTACTAACATTTAAAAATAAATATTTATGG<br/> TAACAATGACATCAAAACAATTTTGTGAGAGAATGTATGCAATGTATAAATTTACTTGGTGGGAGTGAGTCCGGATGTGCTCAATGTTCAAAC<br/> GATAGATTTTCTTCGGGATATGGAAGGAGAAATACGGTTTTTAAACCAATGCACTATGAAAGCGTGCAGATAATCACAAGTTCCTTATAAGAT<br/> AGAAGCAACGAATATTTGATCAAAATTTCTAGTAGAATTTAAATAAATAAAGTGGTAGAAAATACCCTTTTAAACTTATAGTTATGGAATAA<br/> GAAGATTGTCGGTCAATACAAAATAGCGATGTGCAAAAATAGAGGAAAACGATACATTTGCCGGAACGTTTGAATAAAGAAGGTTTTTATG<br/> TATCAGTGGCGTGCATCAGTATTTTACTTATTTGGGAGATGACAAATAAATAATCGGTTACTGAATCAAGTACAGGTTTTCTGTGTAATGTC<br/> TTTGGATGTTGAAAAGGGGAGAACTCTAAAACCTGCGCATGATAGGATAGTTGATAAGTTGAAGGTTTTGATCCATCTTTAGAAAACCTGGA<br/> ATAGTGCTAAAGAGATGATGAAAGAAAATAAATTTCCCTATCTCTTAAATGAAATGGAATAAAGGCTAAAAGACATAAACCATGAAAGAA<br/> GGTAGAGAAAGCAAGATCGGTAAGTAAACGAGTTATTTCCGAAAATATCAGAAAATCGACTGATAATAAAGGCAATGGAGGACGATTTCA<br/> GATTAGTAAAGAAAGATTGGGAAATTTGGCGATCGAATAAATTTGAGAGAAAAGAACTTGAATATATACAAAGGAAATAAAAAGGAGG<br/> GTTAAGTATGAAATTTGGTAACTTACTGTTATATAGATTTGGGTTCAACCGTGAAATGTTGGAAAGTAAACTTTCAAGAAATACCGCTAAGG<br/> AGAAAGAGATGAAAGTCTAAGAAAGGTTTCCGGTATAATGGAACACATCAAAAATGGAAGTGCCTTAAATGGAAGTAAAGTAAAGTAAAGTAAAGT<br/> TATTGCGGTGCTGTGCTATCTTGAAGTAAATGTAATAAGGAAAATAAAGTGTCTTGAACCCGAGAAATCAAGAAAATACAGTAAAT<br/> GGCGTGTGAGAAATTTAGAGATTTACCATTTTAAATAACTAATTTAAATAAATTAATATGATTTAATCAAAAAGTATCTCTTTAGC<br/> TAAAGAGTGTACAGAACCAATGAAAGAATGAAGGCAAAAAGGTTTTTATGAATCAGATGTTTTTGTGTAAGGTTGAAAGGTTGATAGTGT</p>                                                                                                                                                                                                                                                                                                                                                                                                                                                                                                                                                                                                                                                                                                                                                                                                                                                                                                                                                                                                                                                                                                                                                                                                                                            |

CTGAGTTCTGCGAAGCTATGGAGGCTGAAAGAAAAGGCAGAGTTATAGAAAACGATGTATATGACTTTGCTATGAAATAGGAAATCAAAGGTA  
GGCTTTGAGTCGTATTTCAAGAAATGGATAAAGGATACAGCTTAGTGTGACTCGCAGACGCTGTTTTATCCGGTGTATGGACGCAATAGGACA  
TTCTATTTGATAAAATTTGCGGTCTCCACCAATTTTGTGTTTTCAAAGTATGGTTAGCGATCATTTCAATAGTTATTTGATTTGAAAAAT  
CTATTTTCATCAAAATGTTTATATGCCATTCAAATTTGTGCCAAATCTGTATTTGGCAAATCGTGCAATACCAGGATTAATAACATGATGGCA  
ATAACCATTTGAGCCGCAAGCTTTATAACATAGACCTATCTAAAGCAATAGAGGCAAGATAAGATATAACGAGTTGAGAGGTAATAAATA  
TGGGAAATAATTAATTAATTTGATATGGAAAGAAAAATTTGATTTAGCAAGAAAGCGGTTTTATTTGTTGATCCGGAGGTTACCAA  
GTTGGGGGAGGCCATTACAAGACATCCGGCATGCGCTTTCTGAAATTTTAGAAAGGAATAAAGTTGGTTTTGGAGGGGAACGCAATGGAA  
ATATGTGTTTTAGGCACGATAAGAAGAACAAAGAAGAGATTTGCTAAAGGCTATTCAGTATATCAAATTTGATTTCTAAATAACAAATATGGTA  
AATTTCTAGTAGGTGATTTCTGTTGAGTGAAGAAGAAATATAGAAAACCTGGATGAGCTTATTTGAGAAGCAAAATACGATTGAATTTGATACT  
ACTTTTATCAGAAATGCGTTAAAAACCGCATCAATCAGAGTAAACAAAATATCGGTAGAAAAGCAAACCTTTGATGTTGCAAAGCTAAGAGA  
GGTTAAAGCCGAATATATCGAAAATTTGTTTTGTCCGATATACAAAACACAGGCTTTTAGATATGGGCTACAATGGATAAGAAATAGCA  
CGTATTGCCTTAATTTTACGGCAAAAAATGGAGATATGATATGTGTTAAGCCTGGGC

CLONE E4

GATATGTGTTAAGCCTGGGCAATATATTTGTGTTGTTTGAAGAAGGTAATAATCAAGTGTCTCAAAGGAAGGTTTGAATTTCTTTTTCAAC  
CGAAATACTAATAAAAAATAAATAATGATAGGTCACGTTGCAAAATATAGCAGCGTGACTTTATTTTTATATTCTATAATAGTGTATTTTT  
GCGCATATTTGAAAGATTATATAAATTTGTAGTACAATATACGAATAGAAAATATAAATTAACCTAAAAATACGCTTTAAAAATGGATAAAAAATAGG  
TTCAATGAAAAGAGGGCAGGGAAGGCATAGCCGACGACGAAACAGACTGAAAGAGACCGTTCCCTTTGCCTCTGATTTGTTTTGAAAGGTT  
ATTTCTATAGAAGAATAGCGGAAGCGATTAACGAGCGAAATAAGCGGGATGAAGTGCCGTATACCGTGACTTATCAACAGTGTATAATGAT  
ATTCAGTTTTGCCTGACTCAGTGGAAAAGAGAACAGTTTCGATAATATAGATCAGTATATTACGCAGGAACCTCAATTTGGATAATGTAGC  
TCGTGAAGCCTGGGAAGAGTGGGAAAAGTCTAAGCGTCCCAAATGTAAAGCAAAAGTATATTTTAGGGAAGGCCAAGGAGGTGCAAAAGGAAA  
CAACAACGGGTGATCCTTCTTTCTGAAATGTAGTTCTCAACGTGCAGCAAAAGCAAGGTTATTTGGGATATGATTTCCCGCTATGTATA  
AACTTTGGTAGGAGACAAAGAAAAGAAAAGCCTAAATACGATTTTTCCGATGTTCCGGAGGACGTTTTAGAACAAATTTGGCAGATTTCTTTGCA  
AAATACGGGAGGGTAAAAAGTAAAAAGTAAATGAAATACCACTATTTGAGATTTGTAAGCATGTTGCGGAGGAAAGTTTAAAGCAATATGC  
TAAATTCATAGTATAAATAATGTTCTGAGTCAGTTTCAACAGTTTACTACGAGATTTCTCGATAGTTTGGACATGTTGCAATGTTAAGTAAAT  
TGATTTGTTACCGTTCCGCTCAAACGTGAAAATCAGAGGGTAGTAGTAGAAAGCTACCTTCTTTCTTTTGGGGCTTAACCCGCTTTAAAG  
ATATTTGATCGGTTCTTATGCCGCATCACTCCGAGAGGGGTTAATAAGGATGTACAAAGAAATAATGGATACACCGGAGTATAAAGCCTATT  
CCCCGACCCCAATAATGGGAGAGGAAAAAATCGAGGTTCAAGCGTTTGGGAGAACTCAAATAAGCAGGAAACAATCGGAAAGGGTG  
GGTATGTTATGATGTTGAGTAAAGTAAAGTAAAGTAAAGTAAAGTAAAGTAAAGTAAAGTAAAGTAAAGTAAAGTAAAGTAAAGTAAAGTAAAG  
GCAAATTTCCGATTTATCCGGGAAGCTGCTTGGAAATGGTACACCACAGTTGTAACCACCGCTTACACAATAACAGTCAACAACCTTATTGT  
GTTTTACGAGATGGCACAAGGACGATTAATAGGGAGGATCGAAGATAAGGAGAATGTTATCACTGTTGAGAAGTGGGAAGATTTGGATAATA  
TACCGGATGGCGCATGGGTTAAAAATAAATTTCTGCTTTAAAGTGGGAGAACCAACAGAGATGACCCCGTTTACCGGGTGAAGCACTT  
TGGGAAGAAAACATAGCGCTAAGAAATGAAACGCACAAAGAGAATCTGATAGAAATGAATTTGAATGTTTGAATCAAGGAAACCCCGGTTAG  
TGCTGAGGGGACTCTATACGGTAACTTTAAACGTATACCGATAAAAACGATTTTGGTGTGTTGGTCCGAAAGGGGTAACATACAGACTGTG  
CGGATACTGGTAGCGACTACCTTTGTTCAATTTGCTATGATAAATACAGTCAAAGAAAGCGGTTTGAATGAAAAGGAAAGGAGGTATAAG  
CATCTTATTTCTGCTTGTAAACGGATATTTGTTTATACTCCGCACTAAAGGAAACGCAGGTTAGTGTCTCAACATGTTGAATATGAA  
TAGTACAGATTTACGCAACACTAGAGAGTAAATACCGAGGGTAACTTCTGCTGATTAACACTGATGATGATGATGATGATGATGATGATGATGATGAT  
TCTGTCAAAGGTTAAATAAAGAGGCTCGTATATTGTGCAACGCTGCAAACTTACTCAATCTATTGTTATGCCGTACGGGTGGGAGTACGCT  
TTCCCGAAATTTCCACGAACATATAACGAATACCTTCCGTGATTTTCCGCTAACAAACATGATGATGCGGCAGACGTTTTAACTGGTATAGT  
CGAGAAGGAAGTTATTTCAACTATATATCAAAAAAGAAAGGAAATAAGGGTTATAAACTGATAAAGTAGGAAAATGTATCAGACTTTCAAGT  
TTATACGGTATATTTGCAAAGTAAAAATCAATTTGTTTAACTAAATTTTATAAATTTATGTTGATTTGTAATTTGTCC

CLONE E5

TTATGTTGATTTGTAATTTGCTTTTAGCGCAAGCAATTTCCGGATATTTCCCGCATTTAGCTGTCCAGACAATTTCCGGCAAGTTCAAACCTT  
GCTTTTCAGAGACTCGAAAAACCGGCAAGCAATTAACACTATGACTGCCGAAAGTATCGTAAAGTTGGCTACATGGACTCCTTTACTGCT  
AGCAAAAGACGGTACTAAAGTAGTAGTTACGCCCTTATATTTACGACCGCAGATGAGGCGGGAGCTGCCCTTACTTATGGAGGTGGAACG  
CAACTCCCGGAGGATTTGTAGAAATTTTGGGGTCCGAGTCCGACCCGTTTACGGCTTCGTTCAAGAAAGTTGGCCGAAACCTATCAAAGCT  
ATGAAAGCGTTGATGTTGTAAGCGGGTCAAATCCGGTGTGTTCCCTTATCAACGGTAAACGACAGATTGCTTGTGATAAGACGGGTAATAATTT  
GCACGGTTTTCCCTGTTTGGTCCGCTGTTTATCCGGTGAATAGACTATCCGAGGTTTGAAGCTCCGGATAGCAATGCTATTTACGTGGAACCTCA  
TCCCATAATTTGGTCCGCAACCTCACTATCGTGAACCTGACTTTAAACCTCTGACTCAGTTAGTGCCTTCTACGGGTATAGCGGATGATAG  
CTAAAAAACGTTATTTCCCTCAGTTGTGAAGAAGTGGGGAAACTCGTTTATTCGATATTTGAACACGCTGAGAGACTTTTGGAAATGGTT  
AATAATGGAGGGTGGCATATACCGGAGGACTCAGAAATTTAAATTAACGAAAATGGGAAAATCATTAGACGAAATAAGGGAGATATACAGAC  
ATCCGGAGGGGATCAGTCAAATAGCGAAAGCAAAGGAAACGAAAGAAATAGCGTTTCAACACCGGGTGAAGACGAGTGTATGATGCTAAT  
AAGCCAGTAATTTGACTTTCTTCTAAGTTAAGCTGGATAGCGAAAGATAATGATAATTTCTCTATCTATGTTCCATGTTCCCGGTTAA  
AACAAATGGTGTACTTCTGAGATATTCGACAAACTGAGCCGTTTTCGATGGTAGGAATCCGGTTTATAACTATCAGTTTAAATCATCTG  
AGGATCCGGATGACTGGGAGTATTACCGAAAGGATGTTTTAAAGAACCTTCGGTTTGGAGTACGGACGGTTGGGATAATTTCAAGCATAGA  
ATTAACCTCTGTTTTGGTCTGATATGCGCGAGGTTACAGGTAGGAGAAAACCCAGAGCCGATTTTTTTTTGGTTGCCTATTGCAAACTGACT  
TTCTTATCGCACATGTTGGAAAGACTGTAATTTGATGGCTTATATCATGTCAGTAAACGCAAGAAATAAGATCGCTATATTTGATGAAAG  
GTTATGTAAGATTTGATAAAACAGAGGGAACGACTTTGATTTTAGAGGTAGACATAATGACAGATTTGGGCTATTGCTCCCGCTGTTTTCTTT  
TGGTCTGACTCTATATCATTGAGTGAACCCGACATTAATAAGCCCTATAACGAGCGAACCTGACTCTTTGACTGGTATCTTTATTTATTC  
CACTGCAAAAGAGCATTTAGATTTTATACCGCTTTATCCGATTTATCCGGTTATGAACGTGATGTCACATGAGTACACAGATGGCAAG  
AACGGTCCGATGATGTTTTTAAAGAACGAAAACAGGAGTCCGATAACAGGTGAGGACGGAAACCGATGGCGTGCCCGATTTGCTCAAGC  
AAGCGTTGCGGGTCCAGGCTTTATGTTGAGATACCTATCCGACAGAAATGCAACAGTCCCGACTTGA AAAACCCGATCACTATGCT  
ATCCGCTGATACCGGATCACTCGAATAACGTAACGAGGAAAAGAGGCTGAGAGGAACTTGTAAAGATCCGTAACCGGTGGAGAAGGGG  
AATTAACAGGCTCTGAGGCTATTAACGAAAAGCAAGTTAAAGCGGTTTTGAGTCTTTGACTACTAACTAAACAGAAATCAAACGAGGCTTC  
GAGGAAGCCCAACTCTGACTACTATCTGTTTACTCCGTTATGTTGATAGCTTTGTTTCTTGCATATTAACACTACGGGACTGAGTT  
CTATATCTATACACCGGAAGAGCTTTACAGCGTTTAAAGTACATGAAGGAAACCGGACGCTCCGAGGCGGAACCTGATGCTAGGCAAC  
AGATCATCGAAACGAGATATCGGAACGACCTTACACAGATGCAAAGGTTATTAATCTTAAACGAGATAGAGCCTTATTCACACTAACGAGA  
GAAGAGCGGTAATCTGTATAAAGAAAACGTTATAAGTGAAGAAATTTGCGAGTTAAATTAACCTTACTACATTTGTGCGTAGATTTGA  
AAGGAGAACATGAATATCATTGAGTTCCGTTCTGCCTTGAC

CLONE E6

GAGTTCGGTTCTGCCTTACTATAAAAAGAAAATGAAATAATTTAATACTTTAAAAAGTACGCAATGGTTTACAGAACGGATCAGT  
TAGATCAACTGAATGAAAGTAATTACGTTTCCCGAAGGATGAAGTTAAATTTGATACGTTATTCAGAAAGTGAAGAGGTTTAAACCGAAA  
ACAGGGCAAAGAATCAGCGTCCCGGTTGCAAAAATACAAGCGAAAGACTTTGAACTTGATATTTGCCGAGACTGCCAAGATTTGGGTTA  
TACATTTAGAGTTGTTTTCCGACCCGTTAAATATGAATCTACAATTTTCAGAGGCAAGACGAGCCGCAAGACTGGCAGCGGACCGGCAAG  
AAATGAAGGCAGACGAAGAACTGAGAGAGCAAATTAGACGTGAAGAGGCTGCAAACTTCGTGCGGAAATGAAGAAACAAAAGAGAAAGGA  
GAAAAGTAAATGTTAACAGTAGAATTTGCTTAGGCAGATAAAGCGTTATCCGAGCTATCGGATGAAGTTCTTAAACGCTATTTCCGAGCTTTCA  
AAAAACGATGAAGCGCAGACGGTTGCGGCAAGGTTGAGAGAAGCCGAAAACAGTATTGCTTCTCAAATGAAAGAGGCTTTTGGTATTGAGG

TGTAACCGATCTCGATTGAAAACCGCAATTGAGTTTGGCAAACAAAACCTTCTAAATCTGATACCTCAGCTTTTGAAAAACAGATTAACG  
ATCTGAAAGAAAGACTAAAAGCTGAGAAAGCTAAAAGGGAGGAGACCCGGTACTGATAAAATCAATCAGCTTACTCCGAACTAAACGCAC  
ACCAAGAAAATTTCTGAGTTGAAACCAACCTTTTCAGAGAGGAAAAGGAGTTAACCGTAAAGTTGAACGATATCAAGATCACTTCTTTA  
CAATTTCAAGCCGCTATGACAGGGGATGAAGTTTAAAGAAAGATATTTTCAGAGCCAGTTCTAAACGTTGTGAAGCAACAGCGGTTAACTTCTTTA  
AACTCAATTTCTACCCACTTTGACAGGGTGCAGGAGTTCTGAAAGTCTTATTTTCATGAAAGACCGTGTACCTTACAACAACCCCTGCAAC  
AGTCTGAAACCGTTTACCAGCATCAGAACTTCTGTCTCAACAGTTTGAACAGTTTCGGTGTGCTTGACAAAGGTAGACAGGCAGGAGGTCGGG  
TAGTTCGGGAGGCGGACAGGTAACCGTAGCTTGCCTTGATTAAAGCGGTTGCAAAAACCAAGGTAGAGGCAAAACAGGTTGCGCAGAGTATT  
TAGCTAAGAAAGGTTATACAAGCGAGTCGGAAGAGTATCAACCGGAGCTTGATAAAATTTGGGTTGAAAAACAAGATCGCAGATTTGCCAAC  
GAATAACTAAAGAGGGGGTTAACCCCTCACAATATAAACTTTAAAACAATAGATTTATGTCGTTAATGCTACAAGAACACAGGAGTTTCA  
TTAAAGAACCTTAACTTGACAAAAACATGGCTCGCATGACCGAATGGGGTGCCTATGACTTCTTTTTGTCTCAAAACAAATGCGATGGACTC  
AATGCTTTCCGATGAAACTAAGCTAGAGCGTTTCGCATCTATGGGAAGCGATTAAGATTTCCGTAATTTGATACGATAAAAACGTAACGG  
TGTCACACGCTCGCACATGCGTTATCGCAGATGCGGAGAACATTTCTCGTTTGTATCGGTGTAACCTGGAGACCTATGCTTTCCGTTTCACT  
ATGACACCGAATGATTTCAACAACGAAATCGATTACCAACAGGACTGGAACAGAAAGCTACAAAAGCACATCCGTAAGTTTATGGATAC  
CGTTGATAAAGGACGCTATTGCGGCTTTGGAGGCAAAACAAACGCAAGTGTTCGGAACCTTGTGTATACACAAAAGAGGTAATGATGTAC  
AGGTGAAATTCAGTACGCGCAACGACATCTCAGCGATTTGACCCGATGTTCCGTGCAACGACTATCCGGTCAACTTCAATCATTTGGC  
GACACTGGTGTAGACTCAATGTTGCGTAAACTGGAACAGCAGCGTTTGTACAAATGACGTTAACAAAACAGTTGGAGATGTCAAAACAAAGTGT  
CCATTTCAACAACAATGACTTTAGAGCCGAAAACCTCGCTCAGATGTATGCTGTGAATCGGGCAACGTTGGTTTGTGACCCGTTGATG  
ACCGTGCAGCTTACAAACACTAAGTTCGGGCACGATGAATTTGAAAAGTTGTTCTTCTTATTTTCGGTAAAGAGGTCGGAACACACTAC  
TACGAAGAGGTGGCGATCAGTTCGGCTATCGCAGGCGCAGCACTGCCGACATGACTTGTGACGTTAAACACTTCTACGTTTCTCAGTAGA  
TATTGCTTTTCGTAGTAGCTTTAACTCCGATACTTCAACAATCGCCAACCCGATTATGAAGATC

CLONE E7

CGCCAACCCGATTATGAAGATCGAAGTAAACAAGAAAATTCGCAGTTTGGAGGTACTCCGGTATTTATTACCAATGCTGAACAGATCGGTTG  
GAGGTTCTCCGGTGGCGAATTTACGTTTAACTTGTCTAAAATCGGAGGTAGCCCGGTTGCTGAATCTGCTTGTGAAAGTAAATTTGGATAAA  
GTCAAAGGTTGACCGGTTTCCGGTACTGTTGGCGTATGTTGATGTTAAAGTCAATGCGCAGGCTGCAAACTTAAATGTTAGGTTGAAGAACTC  
TGATAGCGCACCTGTACCAACAAAACCTGTTGGCGGAGCGTAACGAGAAAGTAACTAAGTATTAACAAGGGAGGGGGACAAAATCCCTTC  
CCTTTTTTTTATTTAACCATGTACAGATTAAGGATATACAAAAGAACTTGCACCGCTCGTAGGATGGCGGCAGTGTACGATAGAGACG  
CTAAGATAGACGAAAGTTTAAACGGTGTCCGATAGTGGTGTATGTTTCAAGCGTTTACCCGCTTGTGACGCTAAGAAACATTTGAATCTATT  
ATGCCACTTGTACTATTACTTTTACGGTATCCGGAGTATCCGGTACTCCGACTTAAAGCGGTTGATAAGCCGGTGAACAGGTAAGCTTTACGTTATGCACACT  
AACGCTTCTGTCGGCAGTATGGGAGGCAATAACAGAGAATGTTGGTGTAGAGCCTTTCAGAGGGTGATAACTGGAACCGGTACAATCCACTAA  
GCGATTATTTGCGTGAATGTAACGAAAGAGCGATCACCATACCGTTACTCGCTTCAATGAAAAGTTGATTTGCAGGGGAAACAAAGACG  
CTTTTGGAGCGTACAACTTCTCGATGGTTCGGGGAAGATAAATACGAGATGACCCCTACCGATAGTATTTGATGATGAAATATTTGCC  
AGTCCGTTCTATGGGAGTAAACAGCCAAGATCGAGAAGATAGGTTTGCAGTTTAAACAAGCCGGGAAGGTAAGCTTTACCTTATGCACACT  
CACAGGTAGACCCGATTAAGACGTTTGAATTTAATACTAAAAATGGTCTTATCAATGGTTTGTATGTCGGTAAACGATGTTTACTCCCT  
TATATGCTCTGAGGAAACCTCACCCGGTGGCTTGTGGTACTTGTGTTACGATCAAAAAGAAATGCCGTTGGGGATGATGCTATAAACGCTCTC  
TAAGGACTTTTACGTTGACCCGTCGGGTACTTGTAAATACGGAAGCGTGCAGGCGTGGAGAGAGCTAACAAGTATATCAGAGTGTCCAGCT  
ATAGAGTTGACTCTACGCACTCGGAGGATGCGTAAGATGTTGAAATATAGAAATGAACATGTATACGCTCTCAATGCTGCTGCTTTAAAT  
GTTCAATTTGTCGGTAGGATGTGATATAACTGACTTTATCATTCAGTCTAAGTATGCTTTCACGCATGCCGTTTCTCTGCAATGGCTTCTTA  
TGTGCTGCGAGAGCTTGCATTAATCCGAACGTCGGGCAAAATGCCAACCAATGAATATCGACCGTGAACACTATTTGTACGAAAGTTGACG  
GAAATTCACAAGGCGTGCAGGGTATCCGATCAAGCACTAAGAAAGGCTTTTGAGGCTCTTCTATTTGATACAAAAGGGATGGATAGAAATA  
TGCCTTTCTTCCCGGAGTAAACCGGTAAGATTTAAAGCAACATGATAAGCGGTTCTAATAGATAAGTTTAAAGAAAGGTAAGGTAAGCTGAC  
ACCGGAGAAATAGCAAAAAGATTTGTCGCTGACAATGATAATATACTTATGACATGAACGCACAGGATCAGCTATACGCAAAAGGTTGTTAA  
CCGTTTGGGGGTTCCGTATAGATGAATACCAACCCCTACCGACCTTAACTATAAAGGTCAAAATAGAAAAGAGGCAACCGTACGACCCGGTGA  
CACTAAAAGACACAGGAGGATTTTACGACTTTTATGTTGAGACAGCAGAAAGATCGGTTTACATAAAAAGCCTCAGATGAAAACCAAT  
TGGCTTATCCAAAATACCGTGTCTGAGATTTTCCGGTAAACAGAAATGATCTGCTGAGTTTAAACGATTTATTAACGATTTGTAAGACCAAGCATA  
TAACAGAATAAAGGAGATTTAAATGAACGATAGGGCTATAAATTAGACCAAAATGCGACACTTTTCGATAAAAACGATAGCCGATGTACAGGTA  
AGCCTAACAAAATCGCTTAAATGGCTTAAATTCGCTTTCGGGAAACGTTGGTTAAATTTGGTAGAGAGAAACGAGAGGGGAAATTTGTTACCC  
ATCAGTGTATTTAAGGAAATGATTTATTTGCGCTTAGAGCCGACGATAAGCGGGCAACGTTTGTTTTTTCTATATGCACGACTACAAG  
ATTATGAAGGGGAGACTCTTTGCTGCGCTTTGGCGATCTGAGGGG

CLONE E8

GGCTTTGGCGATCTGAGGGGACGGTTAGCATTATCTTTTGGTTCGATACCCGTAATAATCCCGGGAGCAGAATATTACAACGTTGGAGTTGT  
AAAGTCAGAAATCTGAGAGCCTTAAACGCACGAACTTTATCTGCCATCCGGTGTATACAGGTGAGAAAGATATCCACGACGCCAACCAACG  
TATACAGGAGTTTCTATCCAAAAGACGGAGAATCAATACTACGTTTATCCCTATGCGGTGTTGCGGTTTGAAGTGTGATATTCATTGCGAA  
GAAGGTTGTTTAAAGGGGAGTTTCCCCCTTTTTGTGTTTAAATACATGTTAAACTTAAAGTTTTCGCTTGCATATATAAATAAAGTCCTT  
ATATTTGCAATGTCAACAACGAAAGACCCACAATCTAACCAAGACGCAAAAAGATTTGTTGAAAGATTAATTCATAAGAGTAGAAAATAA  
GCAACGGTATCTACGAAGGGTTAAATGAAGGTTTCGGTATCCGATTAATGAAGCTATAAAGCCTAAATCTTTGCAAGTATGACAAAATATATG  
AGTACAATTAATAAACAAGATTTATGACAGCAAGTTTATTTATTCAGAGAACAGTTGAAAATTTATATGATGAAATTTGTAAAGGAAAC  
ATGGATACCAAGAACAAGTTGATACAATGATAGAAGTTATCAAAAAGAAAGTTAGACTTTTTCGCATGATGAAGCATGATTTTATAAGAAA  
AGCGATCGGAATAAACGAATAACTTTAATTTATGACAGGTGGGATAATACCCACTTCTAAAATAAAGCCATGAAAGTAGATAAGTATC  
TAAAGAGCCACAAGGCAACGAATTTTACGTGAAAAAGTGTAGAGGTTATTTATCTCGTTATGGATAGCTATGATAAAGTTTGGCGTCTATG  
GAGTTTACAGAAGAAGAAGCTAAAAAGGTAGCCGAGCACTTAAACAAGATTTGCAACGAAAGATTTGAATCTAACCGTTAAATATAAGTTAA  
TATTAATTTAAACGTTCAATATTAATAAAGTCCCTTATATTTGCAAGTGTCAAAAAGGAAACAAATTTACTAAACAAATTAACAAAGTTATG  
AAAAGATATTTGTAACCGGAAAAGAGATAAGCGAACAAAAGCAAAAAGAGATTGAAGCTAATAATAAAGTATATGGAAGCAATGACCT  
TTCTCTTTGGGCGAATGTGAATTTATAACAGTTTATGTAAGATAAACAAGTGGGGTAAACCCCAATAAAAAATAAATATATGACT  
ACTTACATTTATAAAGGACAAAAGATAAGCCACTCCAAAATATTTCCCTATTTGCTAGTGCAGGCAATTTACGGAGGAAACAACTATACATA  
TTATGAAGTTTGTAGTTTAAAGCTGCCGAAACCGGCAACGAAAGAGCGCATATATTTTGGAGAGACTTAAAAGGATTAATAACCGTGGGAAA  
CCACACAATTTTAAAGGATGTTTAAACAAGGAAAGAAATGAGAATTTAGAAAAGAGAGTTAAGGAACTGGAAGAAATAGAAGGATTTCAA  
AAGGTTGCGGAAAGTGTATCTAAAAGGTTGATACATGCTTTAATTTGACTTAAACAACGAAAGTGTGAAAGAGTGTGATGATGTTGTTGTT  
CGTTCCGATATGTTGATCTGTGTTTTCAGCCACTTAAAGCCGAGACATTTACGCAAGTAAATGCGGTTTAAACCGTATACCCGATCTTT  
AAAGAAAGTAAAGAGATGATAGGACGAGGAGGACCTACCATTGCAACCGGTTTGGAAAAGCAAGAAGAAATTTCTGATAAAAACCAACTTTT  
TAAAACGAACAGGATGTTGCAACGTTGAAAGTAAATGATGTTGCAAAAATACAGGACTTAGAATCAAGAAGAGAGAGGTTGTT  
AACAGCAACAGGTTGTGCAACTTTAGCGACTTGAAAAATAAGTTCTTATGTAAGGATATAAAGAGGGATGAACTAATAGAACAATAAAG  
AGTTGACCGGCAAGAGATCTTTTATATCTGATTTAAGGAATCAAAATAGCTTAAACTTTCTGATAAAAACCAACTTTTATGATCAAAAGTGA  
AAAAGCCTTATTTGCAAACTTGCAGACAAGAACGAGGAAATTAAGAGAGTGAAGAACTTTTCAGACGGTAGATAAAGAAGTCTGTTGGAT  
TCGTGGCGAACTGAAAATCAAGAACAGGCGTAGAAAACCTAAAAGACGAAAACAAACAGCTTAAATATGCTAATTCGAAAATGGCAAAA  
GACGGTTGATTTCTATTTGTTTCAAGATCGGATATTTGCGGTAGGATATCAAAATTTGCAAAAAGAGATGAAGGATTTGG

CLONE E9

GCAAAAAGAGATGTAAGGATTTGAAAAGAGATAAAAAATCATTGCTTAATCCGAGAGAGAATTACAAAAACAAGTATTTGACCTTTCGAGAG  
ATAAAAAATACTTGGAGATGGCAAACTGCACTCCTGCAAGAACTCGTAAATTAAGAGAGTCTTTGAACGAAAGAATTAAGAAGCTAAGA  
CAGAGACTTAAAAATCGTCTATCCGTACAGAGACTTAAAAAGAAATCATTTTCGCACAACCGTTTGAATCAGTATAACAATAATAGCCGGG  
ATATTTATCCCGGCACAATATTAAGATATGTTGAAGGTAGATATAAGAAATAAGATATTAACCCAAAATAGGTGAGATTATAACCGTAA  
TAGGAGATATGTATACCAGGTAGCCGAAACAATACCGTATAAAGGTGAGGGGTGTGAAAAATGTGCTTTTCATGATTCGGGAAAGGTAGGG  
GGTATTTGTGGTATTTTGTGGCATGTTCTAACTTACCCGTGAAGATGATGTTATGTTTAACTAATAGAAGAAAGAGAACAATAGGAGGT  
TGAAAATGAATAGAATATCTTTGTATGATAGAGATAGATTCCGTACCAGAAAGAGGGTGAAGTGTTTTTTTCGAGAAGTTCCGGGAAAGGGAATA  
GACCGAAGGTAGAGGGGTATTATTGAAAGACAATAGCGGTTGTAAGAATTGCGCATTTTTTAAAGGAGAATTAAGAACTGTGTATGCA  
AATAAATCGCTTAATCGTGGTAGGCAATTAATTTTTAAGAGGGTGAAGAATGAAGAGATTTAAAGAGTAGAAGTATGACACCTTCAC  
AATGGATCACCCGATAACAGGTGAAGTTATCAGAGTCCAAGCAATGAAGCAACAATGTAATATCATGCCGGAAATGTTTATTCAGACAAA  
AGGGGTTTAAAAAGATATGCCCACTTATGAGATGTTTAGATATGCTCACGGGAAAGAGTCAAGCGTATAAACAAGTAAAGTTAAGAAAAT  
TAGATTTGTCAATTTACCGATTGATTTAAAGGTAGGTGAGGAAATGAAATATTAACGCCCGAAGGTGATAAGGTTACAGTAAAGTGCCTT  
GAGGATGAAAGGGAAAATATGTGTGATTTTGTCTTCTCCGGAAATCGGTTTCTAGAAATTTGTTATAGCGTTAAATGACGCGTAGATGAGCG  
TAAAGACAGTGAAGTTTCAAAGAAGTAAAAAGGGAGAGACTCGAGAAGGAAAATATTTATGAAAGAAGTATTGACTTTAAATCGGTGA  
TGAAATCAAGGAGGGTATATACTAAAGACGAGAGAGGGGATATATTTGCTCGTAGAAAAACGGATAACAACATTTGCGTTAAATGTTGTT  
CTTCGTGTTGGTTTCAAATTCACCTTTGGACGATGTGTACAAATAGATTTGACCGCAGGAAATTTTTATTTTAGACCGTTTGAACATAC  
AAAGAAAGGTGAGGAATACAACGTAGGTGATCTATTGAAAAACCTAAACCGGGAGAGCCGGGAAAGTTCATCCTTTCAATAGTAGTAGAGGA  
TGATATTGTAGACGAATTAATAATAGTTGCGAACGATGTGTATTTCAAAGACTGGGTATATCCTACGGATGATGTTGTTCAAGAAACAGAT  
GTGTAGATTTCTTAGAGTATAAATAGTACGATGTTATACAACTGTTTACAAAGACTGATGCGGAGGATAAAGAAATCAACAACATTTGCGTTAAATGTTGTT  
TTTGAGGTGTTCAAAGTAGTACATCCGATCACAGCAACGAAGTAAACAATCAAGCAATACCACGGGATACCATTTCATGCAACGGATGTGC  
CTTCCGAAAGGGGAAATTTAGAAAGCATGTGTAAGCATATCTGTGCGTTAGTGAAGAACGTTAGATGTTTGGTGTCAAGAAAGTAAAGG  
AGAATTCAAATGAAATGTTACAGAGTTTAAAGTAAAGTAAATTAATTAATGTTGACTTATGAAAGAAGAGTGTGTTTATGACTCT  
CTGAGCTAAGTACGAAATGATGATACAATTAGTCTGTGTGAGAAAGAAAGTGCAGCAGAGGACAAGAAATGCTTCTAGTAAAGTAAAGG  
TGCGAATACATATGTTAGGTTCTTGCAATATCTTCCACAGCAATTTATAGACTGGTGTATCCCGTGGCTTTTTGTCTACCGCCACTGA  
GGAAAATTCCTTTTTGGAGGTTCTTATATGATTCAAAGATATGTGTCAAGAACAGACCTTATCCGTATGAATGGAAGCGATATAACCGTTC  
ATCCTTCATTGTTGTACGCATACTTACACAGAGGTGAAAATGAATAATACAAGGACTGGGAGGAATACCTCAAAGATGTGAGTAACTCCGA  
AAAGGTGGCCGAATATATAGCCAATATGATAGATCAGATGAAAGGGAGAAGTAAAGATAC

CLONE E10

GAAAGGGAGAACTAAAGATACTTTTAGATATTTGCGAGAAAAGCAGGATAGCAGCTACGATCTGCCTATCGACTGCAAAAATATACCTTCC  
TTTAGGCTCTTTGTTGTTGAACATGAAATGCTTGATTTTATAACGTGGGCTGATAAGATGGGATATATCCGGTGTGAAGAAGACAAGATTA  
TCATTTATTCGTCTATGATTAAGAGCGGTTTATCGTTGGATCGCTTAAAGTTATGCGGAGATTTGGAAGCGTTTCGTTTTATACAGAAA  
CATGTAGGTTAGGGGCTTTTAGACTCCTTTTCTTATTTATAAACATTTTCGTTTTTATCCACCTTCGGAGAGTTCGAGACTAACGTTTTAAT  
AATCAATATCTTTGCAAAATGCTTTTTATTCATACTTTTGTACAACATAATTTGAATTAATGAGATTTATAAATATTTTCTTCTTTCGCG  
TGCTACTTGTTCGTTTGTAGCGGCATTTTGTGTTAACTTTGCCCAGAAAGACGGGTGAATTAAGACGGATGTCAGTGTTCGTTGTTGTTGTTG  
TTATCTAAGGTGTTCCGGTGTATGTTAGATGATCACTGATTAACGAGCTAATCAACTGCGATTTCTGCCTATCGTTTGGGGCTGTGTTAT  
TTGTTCAAGTATCGTGTGATCGGAAACGCTAAGCCCTATTTTTCATCCTTACACCGATCTTTGCAACACCTATTTGTAGAATTTAATTTAAT  
GATTAATGAGATAGAAATGATGATCAATATCCCGCTTTTCGAGATCGTGAAGGCGGTTAAGTTTAAACGTTGATGTTACGAATTAGCGC  
AGTATTTGCCAAGTTTGAACCTCTTTCCGCAATGGATGGCGTAAATGATGGCAGCAATAAACCGCAGCGCTTTTCGGGTGTTGATAACGAT  
TTTTATCGTTCTTGGAGAAAATTTGCTTACTCAGTTGACGAAAGACGTTTGCCTATATATACGAGCAGGCGAGATTAAGAAAGGATGACGAAATGA  
ACACGATTAAGGTAGGGAATCACACGGTAAACGGTATACGAAGGCATTGATGAAATGCCTATCGTCCGTTATCAGAAGTTAACCGTCTTATG  
CTGATTTGAGTTCGGGAGTTCGGTAGCACTATTGAGGAACTCGATACGATTTGCAACGTTGCTATTTGCTATTGCAAGGACACAGCCGGAACATAC  
GTATAACGAGCTAATGAATCTAAGGCGATGTTCAATATGGCAGGCAATGGTGTACATCCCGAATGATGGCTTTTCCGCTTTCGTTAAGG  
CGGTCGAGGCGTGAATTCGGTTAACGATCCGATCCGATTAAGCGATTAATTTGACAGCTTCAGCAGCTTTCAGCAGCTTTCAGCAGCTT  
TCTGAGCCGTTTTCAGAAGGTCAAAAAAAATAGAGGCGGAAGTATCGGTATACTTTCCACGGATGGCGGACGATCCTCTGATTAAGAGTAT  
TACGATATTAACCTATCTCTGATAAAAAGCAAAGTTAGATAAGCTTGTGAACACGTTAGATAACAGTGAAGGCGTGAAGGAAATAGAAGATAA  
GTTGCTAACCTTCTTCCCGCTCGAATATTTACGGGACTGATTCGGTAGAGATAAAGACGGGATAAGGAGTTTCAAGAAATGTGCTTGGTAA  
TCACCTGAATATGACAGACAGCGCAGGAAATGCGAGTATTTGAAGAAACGAGCAGCGATCAAAAATATCTGAATATTCGAGGAAAGGAAAGT  
AAGAATAAATAAATTTAAATCAAATGGCGAACGAAGTAAAGGGAATAAAGTATAGCGATCTTATACAACCGGACAGCAGTATAAAGGACGCT  
ATTACGAGTTGGAGGACTGCAAAAGATATATGACGCTATGTTAAAGCGTATCGAGGAAGCGCAAAAGGGCTGCAAAAACCTATTTTCAGA  
AGTGGAGGCGCAACGGAGGAAGGGCGCAAAAAGATAGACGCTACGAAAAGCAAGTGCATCTTGGCGAACGCTGAGATAACAATGAAAT  
TGGCACTGACAGAGACAGCGCAGGAAATCGCAGTATTTGAAGAAACGAGCAGCGATCAAAAATATCTGAATATTCGAGGAAAGGAAAGTGGCT  
AATAGTATGGCAGGAAGCTATAACGCTTTGTGCGGCAATACGAGCTAAACAAAATAAAGATGAATAATCTGTCGAGGCTTATTTGGAGAA  
TACGAGGCGAGGAAGGAGCTTGTAAAGAGACTGCGGAGATTTACGAGCGATGGATAAATACCAAAAGAGCAGGGAAGCACACGTTAA  
CGGTTGGTAACTACAACAGGCGTTGATGGTTTAGGCTTTTTCTATATACAGGTCGCTCGTGAACCTTC

CLONE E11

CACAGGTGCGCTCGTGAACCTCCATCCTTGGCGATCAGCGCAATACCTTCTTCTTCTGCTATTTCCAATAACATTCCTATGTTATAGACGAA  
ATACAGAAGTTGCGTGGGCAACGAGGCGAGCGAAAGCAGGGGAGGCACAGGTAAGTATAACCGGAAACTGGTTAAATCTCTGTCTC  
GTTTTAATACCGTGATGGTGTGATATTTGACCGCTTTTCTATTTGGGGTAAGGATATAACCAACTGGATAGGTAGCCTATTCAAAGGTA  
CAACAGTATCAGTTGAAGCATCTACTACCGACTTGAAGATTCATGTTAGAGGCTGGAAGAGTGCCTAAACAGTCTGTGAGGTTG  
AATATCGTGTATAAAGCGGCTACCGATTCCACAGCAGCAAAAGCGCTTTGAAAGCTGTTAAGGAGCTAAAGAAAGAGTATCCGGAGTA  
CCTTAAAAACCTATCAGATGAAGCTATTATGACGGGAAACGCATCAAAGGAATACAAGGAACCTTGCAAAACACATTTCTATCGGTGCAATGG  
CACGTGCTACGAGGAAAAGATACAAAAGAACGCAAGGAAGTTATTTGACCTCGAAGAAAAGAAAGCAAGTATTAGAGGAAGGTCCGGAAG  
ACTTACCAAAAGCAACAAAAGGAGATCGAGAACTTAAACGTTCTGTAAGGTTATCGGTTGTTGTTGCGGTGGCTTTGGAAGCGGCTTTGCA  
AGGGCAAGCTGCGCATGGAATACCGCCAAAAGGAGGCAAGAGCTATGAGGTAACAAAGCAAAATAGCAGTTATCAATAAGTCAAGTGAAGGAATG  
CTAAAAGGTTGGTTATCCCGATCTTCTTGCAGGGGACAAAGGAGTAAAGACGAAGGAAAGGACAAGAAAGGACTTTGATCTACAAGCTGAG  
TATGAAAATAGCCGATAGCTCTTATTATTGATTCAGGTTTGAAGAGCAGGAAGAGCGTAAAAGGCAACGGCAGATGAAGTGAAGAAAGCT  
AAAGGATAGCACACGGGAAACAAAGAGCTACGCACTTATATGCTGATACCGTATAACAATATCAGGCAAAATTCGCTGAGACTTTGGATA  
AACTGCAAAAAGCTGCGGGTGAAGGACTTGAAGAACTGAGCAATACCGATGACCGATGAGGTAAGGCTTTAGAGTGAACCGCTTAAAGGCTTAC  
GAGCTATTAATAACAAGTGCAGTTACTCGAAAACGAAAGAGCGCAGGACGAATTCGCTATTAACAGTCAACCGATAGCGAACAGGTGAAGAA  
TGAAAGTTTGTCTATCTGCAAGGTCGATCAGCTTGCATCTATCAACTGCAAAAAGGATTTACGGAAAATCAAGACAAACGATATAAATG  
ATCGGTGCGTGTTCGCTTAATCAGCAGCAGCAGGCGGAGAGTCCGCTTAAATATGGTGAACGCTTCGGGAAAGAAACAGAGCCGTTTC  
CGGTTGAAATTAGAGGCTGAAAAGTGGGAGCAAAATATAGATTAACAAGGCAAGTACCGGAGAGCAAAATCACGGGATAACAGGCTTAAAGAGGCT  
AGAGGATACCATTAAGGAAATAGACAATGCAATTAAGCGTGTACTTCCGGATGGGACAGCAATCAAGGCGTATTTGGAATCTGTTTGTATC  
TTGTTTTCGGTGACGCTTTAGCGCAAAAGATGTTAAGTCAAGCGCAGAGCGTGCAGAACGTTTAAAGACTCCATATAGAGGCTTCGGAG  
TTCCGATAGAAAACCTAAAGAGTGTTCGCGAGGCAAGGTTAGAGGCGCAGAAATTCGCGTACAGGACGAGAAAGAGTTCAGCCCCG



ACAAAAGGTTTTGGACGCTGAGATACAAGCGAGGGCGAACGGATACGCCAACACGTAGCAACCGCACAAAAGAGCTTGATTTGCACGCA  
AACACAGCGAAAACAGCTAGGGATAAAGAAGAAGCGCAGAAAGCAGCAAGAACGCATAGATACACTTATGCAGGCTCAAGTTTGGTAAACA  
CCTCCCTGTGTTAAAAATGCGAAGTATTGAGGATATTTGCTACTGCAAAATAGACAAAAGGATAAAGGGCAGTATCAACGCGATCAAGTAA  
CTCACAGCTATCTAAAGCCTCGCAGGACACGGAGGAATACGGTGACGGTACGGTAGAAATGATTGATTACGGAGGTTGCGACGCATCCGGAA  
ACGATGTAGATTTAGGTACGACTAAGGATGGTAAGCGTAGACGGGTAGAAGCTGGTGAATACCTCGCAGTAGTGAACAAACGCTCATCTCAG  
AAGTATAAGAACTCGTCCGGACTTGATTAATTCGCTAAATAAAGTACTTTTGAACAGAAATACTTAAACGCCTATTCGGGTAGTGATGA  
AGTAAACGAAATAAATGCAAGTTCAACGGTTGATCTGTCTAAGGTCGAAATAAGATCTGAAATCAATCAAAGAGCAGGGGCGTGTAAGTACA  
TCACAGGTGCAGACGGCAGGATAAATGAAGTAAGGGGAAATATTAACG

CLONE E12  
GTAAGGGGAAATATTAACGAATAATTAATCATAATGAACGTTAAAGATTGCGGGTTAAATTTGGGGGTGTAGAAATACATCCCCACTAT  
TCAGAGCTAAAACGGAAGTTTGGCAAAGAGAAATCAACAGGAGTTTTTCAGAGAGTCGATAGAGGGGAGTTTAAACGCTGATCGGGGCGGACTA  
CCTCTTGTGTTAAAAATGCGAAGTATTGAGGATATTTGCTACTGCAAAATAGACAAAAGGATAAAGGGCAGTATCAACGCGATCAAGTAA  
TATTTGAGGGCTATTTTCAGTAAGACAGATTGTGAGATAGACAGCGATAACCGTACGTGCAAAGTGAAGATAAGCCCACGGGACGAATACCC  
GACATAATGAAGGGTATTGAGAACAATACGATCTTATCAAGCTTGACCCCGCATTGTCTCAAAATAGGGGTATCCAAGCGTCCGATTGTGCA  
AGTTTACATTTGCGGGTGCATCTACAATATCGAACTACCTTGACGGCACTCACTACGAAACTGAGGTTTTCAACGTTGTAACGGATAACAAG  
AGCTAACGGATAAAGATTTCTTTGCTTCTTCGCTGCATACAACGAAATAGAGGTAAGGCAAGTGCCTTATCAGTTCTTTAACGGAAAGTAC  
TACGGAAACGAATGGAACGTACACTAAATTTGGATGGCAATTTCTCAATAAAATGGACTCTAAGCGAAGGTTTAAATATTTGGTTTCTTCACTT  
GGAAAATAAAGAGGGAACTATATTGTACCGATCCGATAAGATCAATTTGGAGCGATAAAAGCTACTACTACATAGATGTTTCTGAAATAACAT  
TCACAAGAATAGTAGATGATCCGACACTTCTCAAAGTTTGGCGGAAACACTGTTCTTTGCGAAGCTATTTCAAAGAATGTTGCTTAACT  
CTCCGAGGTTGACGCGAAGCTACCGAAGTAATAGTAAAGTTTGTATGCTGCAAAATAGACAAAAGGATAAAGGGCAGTATCAACGCGATCA  
AGGAACTACTTTTATACGCTACGAAAGTTTCAAGACGAGCAACAGAGTATGGTGTAAATGATGAAGGCAATATTTTACCAGTAACTTCG  
TTCCGCTGTGGCGGGTACTGGAAAGTTGATCCGGTATGCGGTTACAGTATGGGGGAATATGTCGATTTGGTTCGAGTTTGATTTATCCTAT  
GGCCATTTGAGGAAAGAGGAGGATAAGGAGTATGTTTTAAAGGACTCGTTCGCCATACAGGACGCTATAGGGGCGTTATTAAGCAAATGTA  
TCCCTTTGACGCGAAGCTACCGAAGTAATAGTAAAGTTTGTATGCTGCAAAATAGACAAAAGGATAAAGGGCAGTATCAACGCGATCA  
TCACACAGAAAAGCAACATCTTAAAGGGTGAAGTATGACCGTCCGGCAAAGAGGGCGGAAACAACCCCTCAGCGATATAATGAAGATGTTGCGT  
GACACGATGAACTATATTGGTTTATAGATGGCGATAAGTTTAGGATAGAACATATTTCTTACTTCATAAATGGCGAAGTTATACCGGTAG  
CGGGACGGTCCGCATAGACTTAAACAAGCTTAGATATGCAAAATCGGGTCAAGTAAATGACGTTGAAAGTAAACACCGTCAAAATGATAAAA  
CCGATTCGCTGCATGAGGTTTGAATTTCTTTGGATGGACATAACAACGAAATGATTTTCCATACACAGCACACCAACCCCGTCAACTGAT  
CAAGAGGAAAGAGGAAAGAAATAAGGGTGTCTAATTTTTCGTCGATGTAGATTATATGCTACTATCACCGGGTACTTTTACAGGATGG  
TTTTGCGCTGCTGGGAGCTACGCGATAGGGCGTAAATGGAACTACCGTTTGTACATTCATTTGGTAGACAAGAAACAATAAGAAAGTACA  
CCGTAACCCCAAAACCGGCTACATGTCGTTCTTGCACCTCGTAAATACTACATGCACGATATGCCAGCCTCAGAGATTGAACACGGAGGC  
GATCAGAGATAAAGAGTGAAGGAAATAAAGCGGAGTATGACGCAAGATTATCTTTTACATACGACACCAACCAACCCCGTCAACTGAT  
AACACCGGATAATAGGCAACGGGAAACCGATAACTATGACTGAGGATCTAACAACCTCGCCAAATAACCGTATCTTTATCTTACACCCCTTAT  
AATAGGGGGTGTTCCTTTTAAATGCTATCTTTGTGCTATAATCAATTTTAAATCAAATGGAAGTACATAACAACCTTTAGTCCCTTTGG  
CGTTTAGAAAGAAAGAACTAAAGCCACATACGAAAAATGGTACGCTTTCGGGAAGAACTACGCTATTCCTGCAAGCGCAACACGCTAACT  
CCTTCCAGTTTACAGAGTTGAACATACCAGTCTTTTGATCCCG

CLONE E13  
CATACAGCTCTTTGATCCCGACACGATCGAAGTAGAAGCGGTTAACGAGGAAACGGGAGAGTCGACAAAAACGGGTGTATATGTTAGCTTCG  
ATGTAATGCCGAACATAGGCGGTGTATTGTACGTTGTCACCCGCGAAGAACTCGTTTAGGGAGGCTTTGCCACAGGGAACGATAGAGCAGCT  
TTTTCAATCGGTGATGAAGTATATAATTTTCGACTCTTTTTCGGTTATACCCGGCATAGAAACGAGTAGCAATATCTATTGATGAAATTTG  
GAACGATGAAAAGATTGCTTATCCGGGTGGATTATTTACAACGGGTGCGAACAATGACTTCCGGTATCAGATGTATGTTCTGCAACGATCT  
GCAAACCTAAATACGAGTTTGAAGAAGAGCTAACCAACGTCGCCGATACAAGTTTTTGGAACTGCAAAACGTCACGAAAGGTGACGCTTT  
ACATTCGTTGACCGGAGTTTATTTGTGACGCTATGCGACTGATTCGCTTCTGACTATATCCGAATTTCCGACGATGGCGAATATTAACA  
CGCTCTCAACTCGATTGATTTGATTGGATTGGCAGGAACAATATATTTTGGCTGCTGTTGACTGCCAGTTTGGAGGACTCAATCAACAAA  
AACTCCCTTCTTTCAATAGACGAGATAAAGCGTCTTTTATAATGCCCTATTAGCGAACATTGATACACCTATAATGTTCTCTCCCGATACC  
GTAGGGCTGTATTACAAGAGTATCCGGAAACAGAGCCAGTAGTCAAGGGTAAATGATACGGGAGTTATCCCTATTGACTGTAGATAGTA  
AAATACAACCTATTGCCGTTGATTTGGGTACAGGTGAGGCGAGAAAGTTTAACTTATATCGAATGTTGCGAGACTACATTTCTAAAACCCGAT  
AAGATGCAACAGACTTTTTGTTGATACCTTCTGAGGCGCAAGTTTTCGGTGGAGGCAATGACTGGTTTCCCGCTTCTACAGGACTGATGAG  
GATGCGGAGGTTCAAGGGCTAAACGCGACGTGTAACCAAGTTAAATCGATTGATTCCGGAAGATTATGTAAGTGTAAATAAACAGCCTTAC  
CGTAAACAAACAGGTGATACGGCTTAAATGCGCTTAAATGCGAGGGGAGATTCCCACTTGACAGCAAGATGTATACCGGAAACAATACCG  
GAAAGATCAACAAAGAGGCAATGTCAGTACCTATCAGCCGTTATACAGGAGTTTATCACATACCCACCTTTGTTCCCGGTTTTTTGGGT  
GAGGCTTTAAAATATGGGTTGAGAAATGGCAATGGCAATAGAAATGTCGAAATTTGACAGTAAGACAGACTATGAATATATTGAACTACT  
TATCCAAAAGATAAAGAGCGTTAAACGGTGCATTTGGTGTGCCAATCAAACCGCAAAATGTCAGCTGTTGAAAGAGTAGGAACGCAATATA  
AGCTAACACAGGAGAGGAATTTCCCACTTTTCAAGAGGGGATTTAGTCAGGTGTGACGCTTTGAGGCTATCAAGGTGCGGGACTTACC  
TTTTAACTTTACTCAGTTTGCAAAATATGACTATTCGGGTGGTGTCTTTGATAGCAGCTTGATTTGATGTTACACCCGACTCTATTAGCTTTAA  
CTTGAATGACTGTTAATCCGGTTTTGCTATCTATAAATTTTCAGAGTCAAGCCCTACCCAATTGAAAATACCTTCATTTACCTTGACTT  
TGGAGGAGCTTACCTGGTATGTTGCTTTCGCTGCGGATTTGATTTGATGCTTCAATGACAGTCCCGTAGAGGTTGAGGGTGTAGCTGCAAAA  
GGTGATAATGTTATCCGGCTATTAAGCAGCGCAAGGCATACACAACCTTGTCTATAACAATAACTGGTGTATCCGGTACGGTGTATGGTAA  
GGTTACAGTAAAGCAAAAGAAAGCGGACAGGAGCGCACCAACAATAGCTTAGTTAAATTTCTATTGGGTGGAAGTTAAAGCGGTTGACGGGA  
CTTCTTTCTTTGAGATAAAGCGGAGTTCAACGGTGTGTTCCGGCTGCTGCTGATGAAAGTCTGATGGAAGTCTGATGGGAAATACGAAGAACCCGAA  
CGGACGGGCTTAATTTATATCAACGCGAGGAAAGCGGACCCCGTACATAGAGATATTGAACGGAGTTAAACTAAATCTGTTGCTCCGGTAC  
GAATAGAACAGCTTTGGCGATTTAAGCAACATACAAGATTCTGCATTTCCGGAAGGACAACAGCCATCCGGTAGCGGCTTGTATTGCGATA  
ACGCTTTCCTTTCGTTGATATTTCTTGTGAGAAACGGAAGTCAAGTTGAGGATGAAAGTAAACCAAGCGAAGCAAGATGACGCAACCGCAGCA  
ACAGATCGGAGAGACACAACAGACAGCGCAGGAGGCGAAAGATAGGCTTAAATAATGGGCTGACGATGGTTTTATATC

CLONE E14  
GGGCTGACGATGGTTTTATATCTCCTACTGAAAAGCCTGCTTTGATTGATGAAGGAAAGCGCATAACAGGCGAGGTTTTTGCAGATAAAAAAT  
AACGCTGACAAATACGGTGTATCCGTTACTGAATATACCAAGGCTTATGAAGATTATTTAAATGAACCTTAGATACCTTCCGCCCAACAGCC  
GGAAGATATTGCGGTGCGTCCGAACTTGCAAAAGCAGCAACGATATACTACGATCGGAGAAACGGAGCGTTGAATGCTATTGCGAACGCTG  
CAAAGGACTACGTAGCTGACAAAGGATGACAAAAGCTAAAGGATATTAGTACGAGATACACAGCAATACCGGTAAGTAACTCACTCGCTGTG  
CGTAGTTGAAAGTGGCTGATGTTAATTTGAAAGGTGCATATAAGGAGCTGAAAATGCTGACTATATCGTGGGGTATTACTTTTATGTA  
TGTACCAGTTATAGACGGAAGGAGTACACTTTAACCGTATGTTACACACTTGAAGCAGCAATACAGAAATGGCAGTATACCTAATGGTG  
GCACAACTCGTATGCTACCTTGTGACAAAAGGAGATAAAGTTGTGAAGAAATTAAGATTACTATGGCAGGTTATAAACCGACTTCAGCT  
ATGATTTCTTTCAATTTCCCAACCGTACATACGGCTCAAAGTACATTTAGTACGAGTATGGCTGTTTTGACTGATGGCAATTTAGGTGAACCGTTGGAT  
ACCGTCTGCAAGCGGAGAAAATGTTGGGTTAAAGAACTTTTGTCTTTTAAAGCGTATTACTGATGCAGGGTTTACCTATGCTAGAACTACG  
AAGATGATGGAAGTTGGTATATTAATCCTGAACTTTTGCATAGTGAACCGATTAGCTAATAAGGATATGTTTGGTCAACTTATGACCCG  
AATAAGCAATATATCTATTATAGACGCTGCTAAAAGGACTGATACAGAAACGGACAAAAGATGTACTTATTTATAATTAATATACTGA

TGGCTCAGAGGATATAGTTTGTGAGGTTTATTTCAGATAAGGTAAACACATAAATTCATCACTACACAAAAGCCTATTTCTAAAATAGTAGGTA  
GTTATAGTTATGGTTATGGTACAACATATTAGAGTCCGGTTTTACGAAACGAATTCCTCCCGTTTCTTGGAGTCCAGCGCCGGAAGATCAGTTG  
TATCAATCTGTAAAGTACGACATACGAGTACTTGGCGTTACGGAATAAGTAACTATCTGTAAGACTAAGGTAAGGTAAGAAATTTGGGAAT  
AGGAGCTAAACAATTTGTATAGCTACACGAGTTCACCGCTTAATCAAAATGAGTTCTGAGTCAATGACTATAACAAGGCTTATAAGTGAACACG  
GATTTCAATTTGGTGGGTGCAAAGGGGCTCAGTCCCTTTGTAAGAATACCTAATGTTATACCGCTATGCCCGGAAAAATACACTATTTCCGGGA  
TGGATTAAAGGTAGCCAAAATACCCAGTTGGTTTTAGATTGGATATTTGTGACTCTGAATCGTATATTTGTTAGGCTAATGCACAAAATAC  
ATGGAGTTATTTAAGCACACTTTCGATGTTACGAACAATACAGAGCAAAAGCGGTATATATAAATTTGTTGATATACAAGATATATATC  
GGCCAAATATATGGATTAAAGACTTTAAAGTCGAATACGGTGAAATAGCAACCGCATGGAGTCCAAAACGAGGCTGATTCGGTGTATTTTCA  
AAAGAATATACACGTCACAATAAACATTTGTTGAAGGTAAGATAACATCCACCGTTGAAAAGATTAATGCGGTTGACGGGAAAGTTACCGG  
ACTTGCTTCACGTGTAGACCAAACCGAAAAGAGTATAACGTCAGTTGTTGGGGATATAGTGTATTAATAGTACCACCAATAGGCATATAT  
CAAAGCTAATAGATTAAAGGATGGGACAATAAAGTTTTCCCGTTGGTTATAAATATTTCCGGTTTACCACAAAACAAAGGTTGAAATA  
AGTAGTATTTGATCGGGATACGGAAAACCTTCATACGTTACATTAAGTTCAGCGTTTTCTATGAACTTAACTTTGAGATTGCTCCGGTTC  
GGTTGGGGTTCGTTGCCAGCAGTAATAATATCTTTGACTATACAAAGCATGGACTTCTGCGGGTCAAAGATAGTGTGTTGATTTGGGAC  
AAATAACTGAGACTTCTACTTGTGTGATGGGTATCCGTGGGGGTCTAAATATGATTAACCGTTTTACGACACAACGACCCCAATGTGATA  
AACGTTTATCAAACAGATTATCACGGTTCGTACGGTACATCTTCCCGTTTCGACCCGATGGTACAGAGCCATTCCGGACGTATGGTTACTA  
CTCTGAGATAAAAACGACACAAGAAAGTCTCTCAGCAACGGTTGCAAAAGGTAGACGATC

CLONE E15

CGGTTGCAAAGGTAGACGATCAAGGCGGCGGTTAAGTGGCGCTGAGTTAACATTATCTGCCGATCACGCAAAATTTACGGTGGTAGAAACG  
ACTGCAACAATGCCAATTCACCTGCGGGAAGTCCCAACAACAAGCGGAAGCGGCGGCTGAGTTACCGCCACACGACCGGTTTGGT  
CGAGACAGGAATAAACCTCGGATACCGGAAAACCTCGTACGATCTGATACAGTCCGTTTTCCAAAACAACCGGACAGGATCCCGGCTA  
TCAATGCGAACGGAACCTTACTGCAACACAATCGAGGTTGGAGAAGTTGTTGCCGGAGGTTTTGCCGGCTCAGAGAATCCTACCGGGAAC  
TTGACTGTGACGGATGGGGCGGTGATGTCAGGAATGACTATTTCCGGGAGGTTCTTACTGGGAAGATATACATATCACAGACGGGGCGAA  
GATCCGTAACCTTACGATCGAAAGCGGTATCTTTCTGTTAATGGTATGGTAGCAGGAATGCAAAATGCGCTTATCTAATAACCTTATGGAGA  
TAAGTACTCAGGACTTCGATGATGATCAAAATCCGGTGGTACGATTAAGTTCAGGCTTACGAGGCAACCGGCTTGTATGCAAGGTTAGAG  
TCCTACCGTAAATCCGGTGTATATGAGTTTGTGTCGACACAATGGAAAGCCCGGAGTACATTTTGCCTGACTATTTCTCAGCGGC  
AGCAGTACGCCAAAAGTGGGGAAACCCCTCTATCCGTGTGAGTGGCTAAACACTCTACCGGAAGATATACAGTTCCGGTTTACCGGAGTTC  
ATTCACAGGCTTTATTTCTATGGTGTGGCTTAAATGCTACCAAGTGGTAAACGCTTGTGTAGAGGATATTTGTTAGTACGACACAGTTC  
ACCGTCAAACTTATGAGGTTAATACTGGAATGGTAGATGAGACTTTGCTATATACATTTTGGCGTTTTGTTTAACTTTCCGGTTC  
AAGTTGGTTTTATACCTTCTTACCGCTTACCTTTGTACCAACATTAATCAATTAATAAAAATATGGAAAAGAAAAGTTAGATTTTGTGAT  
TAAAGTCAAGTATTTACACGAAAGAAAACAAAAGTGTAGGACTACCATTTCCGAGACGGAACCGCAAGTACGTTAGGTTCAATTAACAACGGTA  
TCGACAGAGCCGGACAAGTACAACATTAACCCACTGACGGCTGATGTGTGTCAGAGAACAACAAATGGTAGAAATGCCTGGAACCTCCGGTAGTCC  
AATTTCTGCAAGAACAATACGTTCCGGTCCGATCCGTTGCCATCCGTGACGGTTCGCTTTGAGGCAAAACCGGTTTCCCTCTACTACAAAACAT  
CCGCTATGTGAACGACTTTCAAATTTTACCTTTGCGTTAACCGCACCTAAAACAGTAGAATAATGAATGTCACACAAGAACAGTTAAGGT  
TAATGCTGTATCCGTGATAAGTCCGATACCTGCGTTTTTACCCCTACGAGCGGTTTTATAACCGCACTTGTGTTTATGTTCCGGTTTAAAC  
ATTTGTTTTGCGGTTCCGTTCCGATGGGGTTAATTTGTGCGCAATGGTGTTCGTTAGGTTCACTATGCTGAAATTCATCTCAGCCGTCAGGA  
ACTTATTTTGTACATCTGTTGATAACCTTATCTTTCTGCTGTGGTAAAGTAAAGTGGGGATCACGACGCGGCTTCCCTCAGGCTAAGACGA  
TTACATACGTTCTTATGTACGTATATCTGTGCAACGGTTTTAAGAACCTTTGTATCAGCTACCCGGATAACAATCTTTCCGACTGATATAC  
TACATTTGTCGGTTCCGAGTTTAAAGAGGCTGATGGGAGAACGTTGCCGCAAGATAGTCCGAGGAACACGAAGAAAAGATTGAGATTGAAACTAA  
GTAATTAACACGGGAGGTTTAAACGCTCCCTTTAACTTTTAACTTTTAACTTTTAACTTTTAACTTTTAACTTTTAACTTTTAACTTTTAACTTT  
CCGCAAAAGGCAATTGATAAATACGTAACCGGAAAGTGGAAAGTTGAAAGCAATTTGACCTTATATAGAAAACGTAATAGACCCTCAGCGGAGATT  
TACGGCAACCGATCACGGTTAATTCGGGTTATCCGGTGTCTGAGTTAAATAAAGCCGTCGGAGGTTCTGCAACGCTGACCATTTGTTTTGA  
TGAAAAAACGAAAATTTTAACTACAAAGGGTGGAGATCATATAAATAATATATCCAAAGATGATATATATATACATACAATGTAGATAATG  
ATATAATAGAAAAAAACTATAAATAGGATCGTTATAAGAGAATATGACGGGGATATGATCGGATTTAAAAATAGCAGCGTTGACCTACTT  
GTTACGGACGAACATAGAATGCTTATAAGTTACCAAGGCATAAGTATAAAAAGAAAGG

CLONE E16

GGCATAAGTATAAAAAGAAAGGGTAGTAGAAAAATATCCGAAAAGGGGCTTTGTATTTTCGATAGTTTAAAACTAATAATGACAAAATTCAT  
TTTGAGCTCGCTAAAGATGTATTAGGTAAGAACGCAATTTTCAAAATGTTCTTCTTATAAAAAATGGGGTGGAGTGTATATAAGAGTTATGAA  
AATATGCCTTGCAATTTATTTGCGATGGTTTTTATAACAAGAAAGCAATAGGTTTATAGATTTCAAAAAGAAAAGATAAAAGAACTCGAAT  
ATATATTTGAATAATGTTGGTGGGAATATACGAAGCGAGTAGATAAATGCGGAGTTACTAATTTCTATCTAAGAAAAAATACTATGATATT  
ATTTTAAATATCGTAGGGAAGGATAAGAATATACCTATTGAGCTATTGGAATACAATAGCGAAGTACTAAAAGAACTTTTATTTTACTATTG  
TTCGTATGACGGTTCGCTTCGACAAAAGAAAATAAATAACGGGTTTTCCGCAATCGGTACAACCAATAAACAATAATGTTGATGTGCTTCAATCCA  
TGGCTGTATGTGCGGAATAAGATCAAAATCTTATATTAACAAGAAAGAGATATAACATAAAGGGGCAACAGGTTAGCTAAACCTAT  
TATATTTCTTTCCGGTTCCTTTGAATACTCAATCAGATTACAACTATGTTGGATCTTTTGTAGAGAAAATACAATGGAGTTCGATGGTGTGTAG  
CAATGATAATGAAACGGTTATCGTGGGAAGAAATGGTAAGTTAGCATACAAGGTAAGTGTAAAGGTTTTGCGGCTGATATTACAGGAGGGA  
GCAAGGAAGAGAATGAACGGTTGTTTAAATATCATTAAACAACACTTTCATTTCTCCAGTTGATTGACGAGAAAAATTTTCAAGTTGGGTTTCA  
GTGTCGTACAACCCGAATACTTAAAAACCAAACTACTAAAACTATGAACGACAATATTTGCGTTTTTAGCGACTTTTGTGCTTTTGCTCT  
GGCATTTGTGTCGCTATTACTGATAAACCGTGTATTTACGGAAGAAAAGCTTATGCGAAGAAAAGATGTTAGCCTCCTCACAACCTGAAACG  
TGCGTATCGGACGAAAAGCGGTCAAAAGTGCATGAAAGTAGAGGAATGAATCTGACTTTAAAGCAGTACCGGAACACCATAACAGGGAAGG  
ATAACACTATAAAGGAGCTAAAGCAGTCTATTAAGGACTTGAAGGTCACACAAGCGTTCAAACATCAACTGAGACGCATTTTAGCAGCCCA  
GTACGGGATAGTGTGTTCTTCGATAGTTTGGTTATCGACACAATGAAATGCGTAAATATGCGCTCTAAATGGCTTGTATATATCCGGCTG  
CATAGATAGCAACCGGACGTTTCCGGAACAACCGTTTTCCCGTGACAGCTTATGAGAGATACTTAAATATAGAGCATAGAAAGCGGTTTTTGTG  
TTCGACTAAAGAAGGTGAAGTATAGGGAGTTTATCGTAAACGACAAAACCCCTACTGATATAACAGGTTTTTAACTGAACTACGATAATA  
AAGTATAATTTCCATGTTAAACAGTTAATGCACGTTAAAGTATTTGCCACTGAGAAAATATATCCGTATATTTGACGCGTAGAAGTTATTAC  
TACAGTCACTAACAGCGGTTATTGATTTTTCATAAAGTTATGTTTGTGTTAATTAATTAATTAATTAATTAATTAATTAATTAATTAATTAATTA  
GACAGTTTTTAACTTGAACATTTTTTCACTAACTATATATATTTGGGTTTTGTCAATAATTAATTTTCCCTCCCGTGTGAAAGTAGAGGGG  
TTTTTTATTGCTTTATCCGAACACGCTTAAAAAGTTAAATTCGTTTAAACATTAACCTTATGCTTTGATATTTAAAAATATCTCCTTAACTT  
TGCAACATCAAAGGAAACGAAATTAATAACAATAAACAATTAGAGTTATGGAAGAAAAGGAAATTTATTTATTGCTTGACCGGAGAGATTAAAC  
AATTAGGCACTGTCAAGGCTAAAACAATAAAAAGTGTATGAAACTGTAGCGGCTATTACAGAGAGGTTGCTATATTGAAATGATCCGGAAGG  
AAATCAATCTTTTGGAGCGTTTACGTTGCTGATCTCCCGTTTAACTTAACTTAACTTAACTTAACTTAACTTAACTTAACTTAACTTAACTTAACT  
TTCACATGTATGCTAACAATAAAAATTTAGAGTTATGGAATTAGTAAAATTCAGAGAGGCAAAAGAGGATAATGGAAGAAAAGCTTTTTTTC  
AAAAACCGTTGAAAGGTTTTCAGTCCGGCTATCTTAGTAGAACAGATTTATATTTTCAAGTTCCGGGAAGTAGCGTAACATTTTTCAGAAAGGGAT  
GGCGAATTTTATGAAGGTTTGTGCAAAAGCTTAGAAAA

CLONE E17

GTCTATAAGAGAATCTATTGAAAAGCGTATTGGCTATCTTGAATCTAAATTTGATAAACTATGATACGATCATTTAGTAAGTCCGGTTCAAC  
ATCTATGCTGACAGATAAGGAAAAGCGTTTTAACCGCTACTGCTTAACTAAACAAGGAAAGTTTCATATAACTTAATGCGTATAGAAAATGGCAG  
TTGTTCAAAATGTCGATTACGGCAACCGTTTCACTCAGATGTACGCTAACAACCGATAGTTCTGAGGTTTTGGATGCAATTTATACAGTCTTA

ACAAATGAAGGGTTTAAATACTCTTTCAATTTACCTAATAAAGTATTAACCAATAAGTATTTTTTAATTTAAATTTAATCAAATGAAAGAA  
GAAGTAAAAATGTTTCAGACGGTTAATCATTGTTTTTGTGTACTTGTGTTCACTTCGTTGTTAACTTCGTCGGGTGATGATAGTACAAATGT  
GTATCAAACGAATAATCTATGTATGTTCCGGAATGGCAGCGGTTATGTTAATGGTGAAGTTACACACGCTATGTCTCCATATGTTTGGG  
AACATGTGGACTTATCAGACAAATGTTTAGAGTATTTCTCAGCAGGGCATGTGTTAGTTATCACAAGGTTACAAGGTTGCACACATGATTTA  
GGCTTTACCGTTTATCAATAGAAAGTAGCAATAGCGAAAGGTTTGCATACAATAAGAATAAAGGTATATTGCAATATTGGTGCACAAGAAA  
TGGCATTGAAACCGTTGTTGTTATCGTGAATTAAGTAAGTTTCATTTTACCCCTCACCCGGTGGAGGTTAACCGGGTTATTAAGTATGAAA  
GTAATTTGTTAGATTTAAAGACGAAGAAGAAATACCAATTTGTGAGCTAAGTACGGTTTAGAGGTAGAGAACCATAACGGAAGGATGATAT  
CATTGAGTTCGATAATATGGGAAATTTGGTGGTTAATAGTCCGAACGGTGGCTTATTTGGTAAACCACAATGCAGTAATAAAAATATCAATTA  
GACCCGAATAACATGAAAGAGATAAAACGAACTCAATACAGCTATCGACTGAGGAAAAAGACTTCCCGATATGATAAAGCAGGCGAACGG  
CATACACGAATTTGTTAAGCAGAACTTTCTGAGTATAACTCAATAGAGTATACCGATGATAATATAAAGGTGGCAAAGCCGATAGAGCCA  
CTTTAAACAAGGCGAAAAGGGACTTAACGACAGCCGTATAAGAACTTGAAAAGGCTTGGATGAAACCGTTCAACGAACATAAAGGATGTTGTT  
AACGAAACTTGTAAGCTGATCGGTGAGGCTTCTTCGCGCATAGATAGCAAGTAAAGGAAACGGAGGAAAGGAAAGCAAAAGAACTTGGAA  
TCAAATAAGGAGTATTTCCGAGGAACAAATGAAATCTTATCTTGTGTTGATTTTGGCTTCCGTCGGGATTGGCTTAATAAGACCAAAGCAC  
TTTCAGTTGTGAAAATGGAGATAGACGAATATTTAAACCGTTGACGATGATCTTAAACAGACTGAAAGAGCATTTCGCGGAGAGGGCTTT  
TATATCCGGTTATCGACAAATACGCTTACACTCGATTATAACAAGTCGTTTCGATATGGAATCACCTAAAAGAAGCTGCAATACAGC  
CGCAAACAGACAGTTTGAACAGAGGTTGACAGATAACACCGCTCAGCAACAAAAGCCGAAATTAAGCTCCAAAACGAGCCAAAAGCAACG  
AAGAAGAAGTTTATACGAGGTTTAAAGTCCATGTAACGAGAAGCAGGCTTTTGGCTTGTGAGTTTATGAATAGCCACAATAAAG  
TTTTGAAAGTATATCAATATAGACGGTAGCCCAATTTGGGCTACCTTTTTGTTTTGTTTGCATTTGTTGATCTATTGTTGAAACCTAAGGTTT  
CACTTAAACTTTCAAATAATGCTTATATTTGCAGTGTGCAAGAACAAGTAGTAACAATAAAAATAGAATATGAATGAAATGAAATGAA  
TGGCTTAAAGTGGAGTGTGTGATTAATACAGTACAGTAACTGCTGCTTAAAGTAAAGTAAAGTAAAGTAAAGTAAAGTAAAGTAAAGTAAAG  
AGACAAATTTAAGAGTGAACAGTTGGTGAAGCACGCAAAAGAGATTCAAAGGTAATTTAAACAATAATTTATTTAAATGGAACAGTAT  
TTAGACTTACTAAAAGAGACTTTAAATATGTTGAAAGAGATCAGATCGAACAGGAAACGGGAACTATAGCTTATTCGGTTTACAACGATC  
TTATGATTTGCGTGACGGTTTCCCGCTTGTCAACAATAAGAAGGTATTCAGGAAGGAATATATATGAGCTTCTTTGGATGTTAAAAGGAG  
ACACCAATATAAAAATACCTAATGAAAGTGGTGTTCATATTTGGGACGAATGGGCAAAGCC

CLONE E18

ATTTGGGACGAATGGGCAAAGCCTTCCGGTGTATCTGGACGTATATACGGTAAACAATGGCGTGACTGGCGTATAAATAGCAAGTTAAGAGT  
AGATCAAATGATTCAGTTATAGATATGATTAAGTTCAACCCGAAGTCAAGAAGGTTAATGTTAGTGTGGAATGTTGGAGAAATACACA  
TGATGGCACCTTCTCCGTGTCTGCTTTTTTTCAGTTCTGAGCTCCGGTATTTGGATTGAAACTGATACAAAGAAAGTACAGAC  
CTATTTTTAGGCGTTCCTTTCAACATTTGCGTCTTATTTCTATCTTGTCTATGTTAGGCGCAGGTTTGGCGCTTAAAGCCTCGTAGATT  
TCACACTATCGGGGACGGACATATATATTTGAATCAGGTTGAACAGGTGAAAGAACAATGAGTAGAGAGCCGTTCCGCCCTTCCAAATTTG  
AATTAACCCGAATGTTTCGTAATATATTCGATTTTAAAGTATGAAGATATTAAGATAGTAAATATAACTGCCATCCGGCTATAAAGGGAGAG  
GTTGGGTATGAAATGAAAAGAAATTTACAGGTTTTTAGCTTATAAATAAATTTGGTATATTTTGAAGATACCTTTACATGGAATCTGTATAT  
TATCTGAATAACTTGTCAAAGAAAACCGTTAATTCGATTTTGAAGATTGTATATTGAACGCTATAAATCATAAATAGCGGGATTATAAT  
TAAAAGGATGTTGCAACGCTTTGCCATCCCTTTTTAGTTTTCTATATACATACCAGAACTATCGTTGCTCTATGAAACAATCTAACAA  
ATGTAGTAAACAAGTATGAAAGTGTGCAAAAGTAGGCTTTTTCAGTTTCTAATGATCAAACGGATCGTTTTACATTTCAATCAACAATA  
ATTAAGAAATTTCTTTCGTAATTTAAAGTTTAACTTTTAACTTTGCAACATCAAAAAGAAAGTAAACATTAATCAATGATGAGAT  
TAAAAAAGATCAAATTTACAATTTGCTTGTGCAGGTTTGAAGAATGAAGGCATTCCATTCTCTACGAAAAACTTGTTTTGTTTTGAATA  
AGTACATTTGATGAAAGATGAAGAAGATTTAGATTTTGGATATAACAATATCTGATATTGATATTCAATCGCTAAACAATATATCGGTTGATAT  
TGCGGAATGCTTACATTAAGCAATTTACAGTCAATTAATCTGTATTCGTTGGGGGAGATTGCCCGAATTTGCGGAGGTTTACTCAGATTGAT  
AGAATTTATCCCAATTTAGCAACAGTATTTGCGATCTGATTTGAGCGGGAGAGAGGAAAGAAATGATATGATGATTTTAAACATGTT  
GAAAGGAGGTTGTTTTATGAATATTGAAAACACAATGATCCGTATCAATGATGCGATTATAAGCGCACGATGAAACGGCAAAAAGATTACGA  
AAAAGGATATTGCGGCTTGTGTGGAAGGACTCAAAGCAAAGAACGCGAGGCGGTAACATGCTGCCTTGTGTAATCACAAAACCCAAACT  
ATAAAAATAGAGTGGGTGAAAGAGATATCGGAGGCTACCGGAGTTCGATGCAATTTCTTGTTAATATAACCCATAAAAATGAAAGTTATG  
ATTAAGAAATTTGCCTTAACTTCAAACGAAATGAATGTTGCAAGGCTGAGATATAACAAGTTTGGCGGATATAACACCTTACCGTTGAGGA  
TATTTTGAAGAAGCGAAAAGGTTGTGCAAAAATACGGATGTTATGTTATGGTACTGACTCTATCGAATTTATAGAAGGGCGTTTTTACG  
TGAAGCAACCGCAAAGATTGTTGAAACTGAAACCGGCTTATTGAAACGTTTTCGGCTTTTGCACGTGAAAGAGACAGCAAAAAGGGGATG  
GACTCGGCACAGCTAACCGGGGCGACATCCAGTTATGCACGAAAATACGCCCTTATGTTGACTTTTTCGATAGATGATAGCATAGATACTGA  
TTCTACGAACCGGAGCCGGAAGCAGAAAAGCAAAAGACAGCCTCAAACAAGCTATCAACCAAGCTAATCACTGGAAGCAACTCAA  
ATTATTTGGGTGTGCTTCTTGAAGAATAAAAAAGCAACAACCTTATAAACATTTGGGCGATATTCACAAGAATAACGCTAATACCATCAA  
AATAGTGAAGTTCATGAACGCTTTAGTTGTCCGTAAGCGGAACTTGAAGAAGCGGAAGCGGAAGCAAAGAAAGTATAAATAATTCGGGGAT  
CGGTTCCCAATAAAAATAAAGCAATATGAAAGAATAACATTAATCCCAATTTGGTTAATGCTGATGTAACGTATATCAGCGAAACAC  
ATGAATATTTTCAAGCGATTTTAGAAGCTGAGAGGGATAACGGGTTTTATCAATG

CLONE E19

GGGATAACGGGTTTTATCAATGATCAATATTTCCGGGCAAACCTTGACAATATACCGGATAAATTTTTGAGATCGGCAACTGAGAGAGGGAA  
AGCGGTTCAATGATGAAGTTGAGAGGATCGACAAGAAGGTTATGAACCGGAAACCGTCTACGGAGAGAACTATTTGAAATTTAAAAGCCGGAA  
CGGTTTAATTCATATCGCATCTGATATATTTCTACTGATAACAGGTTTATCGCCTCACCGACCGATAAAGTATATTGGGTAGCTGTGAT  
AAATGAGATTTTTAGGTGATTTAAAACCTACCTATAAATTTGATTTGCTTTATCTGTCTTGGCAGCTATCAATATACACTTCCTTTTCGA  
GAGACAAAACCCAAATTTGAAAGTAGAGGACTTATCGCAATTTGGCTAAGAGGTTGACAAGGATAAGGACGGAATTTCTCTGTTGAACGCA  
TACCGGACAGCGAAATAGAATTATTTCTTAATTTGCTGTAAGAATGGAGTTTCGATATGTAGACAATGCAAGCAAGATAGCTAGTACGAAAA  
TTGGAATCATTACCGCAAAAGTAGCACATATTAAGAAGGCGTTTACGAACTTCTTGAATGCAAAAAGAAGTACAGCAACATTTAGGCAA  
GTTCAAAGAACAGTTGTTAGGCTGATGCTGAGGCGAAAGCTGATAATATAAAAAGGGAACCTTATTTTCAGTCAAGAAAGAAAGCGTATA  
GCCGTGAATCACTTGAATTTAAAGCACTGAAAGAACAATATCCGGAATATACGATCAGTTTCGTTAAAACATCAAATGTTAAAGAGTCAAT  
CAATTTAAAGCGTTATAATTTATGTTATAAATGAAGATTTAGCAAAAAGAAATCCGTTTAGATGATTTCAGTATATATTCAGTTATGTTCTT  
ATACTTTGACTGATACATAAAGATAAGTTTAAAGGATGAGGTTAAGAAGAAACCTAATACCGTTTTTATACGATTTCTAAACTTAG  
AGAAATTTCTCTTTATGCTTAAAGCAATATATAAATCTGTAACAGATATTAAGAAGGTTTAAAGGAGTTTAAAGGAGTTTAAAGGAGTTT  
TACCGGCACTAATAACAATAAGTGTATACAATCCGGAAGTAAACAAGCAATAAATGAAACAATTTTCATGAAAGAAACCCACCGATTG  
AGGAAGATTTTAAACCGTGGGATGAAAAGAAAGTACAGTATAATTTTAAATAAATTAACGAAACAGGCAAGGATATATGTTACTGAAAA  
CGATTTAGATTATGAAGAATAGACTTATGAAAAGGATTTGGTTATTCGCATATATGTTGGATAAATGTTGATATGCAACGGTAGACGGGGGA  
AGAAGGAAAATAAAGAAATGAAAGCAAGGAAAAGAAAGTAAAGTAAAGTAAAGTAAAGTAAAGTAAAGTAAAGTAAAGTAAAGTAAAGTAAAG  
ATAACAATATCTGAAAGTTTTGCAACAGGATCGGTTTAAATACAACCCGATGTTACCAACTTGTAAATGTGTGCACAACATTTCCAGTAAAC  
TATAATACCCCAACAGTTTTTATGTTGTGGTGTGTTTTTGTACAGACTATTTCTGTGCGAGTCTGTCTATACCTAATATCAGATATT  
TGCAAAAACAAGAATGTTAAATCATAAAAATAAGTGTCTTCCATTGCAGTATATAAATAAACAAGCTATATTTGCAGAGTAAAATTTAA  
ACAGTATGATATAGTAAAGTAAAGCAATAGTAAAGTAAAGTAAAGTAAAGTAAAGTAAAGTAAAGTAAAGTAAAGTAAAGTAAAGTAAAGTAAAG  
AAGAGGGGAAAATTAGAGTATATTTCAAATTTGATGGTGCATGCTTCAATGAGTTAACGGATGAAGAATGAAAAGTATGCGGAGTACAAAGA  
ACGGATAAGTTCATTTTGAATAGCAAAATAGTATTAATCATTAATAATTTTAGAAAATGAAAAGAAATGATTTTTAAAGGAGAAATCAAATCAA  
TTTTAACTAACAGCTTATTGGTAGTGAAGAAGTTCGGGAAAGAGCACCAACATGATTTGCGTGTGAGAAATTTAAATAAATGGGGTGTG

TCCAAAATTGGTGATACCCCGCATTTGCGGAAGCAACTTACATTTCATCCGCAAAACGGACAAGAATACCCGATGTTTATAATGAATAGAGA  
CGGTTTTACATTGTTGGCGATGGGCTTTACCGGAGAAAAGCGCTTCAATTTAAATTTGGAGTACATTAACGCCTTTAATAAAATGGAGGAAA  
CTATTAAGAACGGAGGTTTTAACGTGCTTAAATCGTTCCGTGAAGCATTATTGCTTGCAGCCGAACAGCAAGAAGTTATAGAGAATCAGCAA  
AAGCAGATCGAAGAAAAAATGCAAAAATCGAAGCTGATAAGCCGAAAGTTCTGTTTCAGTGAAGCAGTC

CLONE E20

GTTCTGTTTCAGTGAAGCAGTCTCCGCTCGAACAAATCTATCTTAGTGCGTGAACCTTGCAAACTTATCACACAAAACGGTTATCAGATCGG  
GGAAAAGCAGTTATACGAGCGATTGAGAAAAGCCGGATACCTTGCAGCGTTGGAGAATCACGCAATCAACCTACACAGACATACATGAATA  
TCGGTTTGTGAGATTAAGAAGCGTGTATTTATGGACGGTGATGAAGCAAAGGTTACAATACAACCTGTCGTACGCCAAAAGGAGTACAT  
TATTTTCAATTAATAAGTTTTTAGGGAAGGGAATGAAATGACACATTGTTTTGACGATAAAGTAGCAACAAAGTTAGGAGTTGAAGCGGCATGC  
GTATTGCACAACCTTCGCTTTTTGGATAAACAAAGAAATTTGCCGATAACCACAATTATTTTGAGGGCAGATATGGACTTATAACACAAGGGA  
AGCGTTATCTAACTATCCCGTATATGAGTCAATCTAAGATATATAGAGTGATAGGAAAGTTGGAGGAAGAAGGCTATTTGTTGAAGGGGA  
ATTTTAAATAAATCGGGTATAGATAGAACAACGTGGTACGCATTAACAGATAAGTGATAAAAATTCCTTTTTGAGTGGGATATACGCTTATA  
GGCTATTCTGAGCCGATTTTGCAAAATGCAAAATGCAAGTTGCAGAAATGAACAATGCAAGTTGCAGAAATGAACAACAATACCAGATAG  
TATATATACAGATAGTAATACTAAATCTACTAACGTAGATTATAGTATAGCCACGCGGAAGAATCTGTTTTGTTCCCGGTTGAAAAGAAAC  
CTTTAGCCTCAGAGATATTTGGCTTTACTGCAAAAGCCTTAGATGTGACTAAGAAAGTGATAGAGCGAACAGATAGTTTTTCGATCAGCTA  
ACATTCGCGTTCGAGTCGGAGGAATTTAAAAAGCCTTTTTATGTGCTAATGACTCAACCAAGTGGCGGGTAAAGACTAAGACTCTAACAGC  
TATGCAAGCAAACTTAAACGAGATTGCGCAATTTGAAGAAGGTTTTGCTATGCTATTGATAAATCAGAGCATATCTAAGGGATGGGCTTCAC  
TGGTATACGAGTCAACGCTAAAACAGTATATGCAATGGCTACGGGAAAAGACGGGAGTCTCCGGAATACACAGCCTGCAAAACAATACTAAA  
TCGTATTTTCAGAGTGACGAACAGCGCAGGATGTATCAGTCTTATTTAACGGAGGATTTTACATAGCATTTTAAGGCTTAAATTTCAATTTT  
AATCACTAAGACAATAAAAAGTATCATGTATTTGGAGAAAATCGAAAATTCGGGCGGAAAATTAGCAAAATACGAAGGTTGCGGATTGTTTTAT  
AGAGAAGAACCAGAAAATTTTATGAAAGTGGCAACTTCGGACAGCTATCAAAAGTAGATCAAAAGATATTCGGTGATTCTACTTTGCTTTTGG  
TGTCCGAATGTACAGACGAAGAAAAGAAATAGATAATTTTCTAAGGTTCTTAACGGAGTATGTTTAGAGACTGGTTAAAAATGCCGGAT  
GTCGGGACGCAGGTAGTATATTTATGCCGTTTGGCATGTGATAGATATGATTTTCTCTGATCTGTCGTTCAATGAAATTCGTTTAGCGTG  
GAGGTTACTTGTGTCGGGGAACCTGACCCGTTTTTGCAAAAGACAGATATGGTAGTCCGGATAAAAATCATATGGCTCTCTTTTCGGTTG  
ATTACATTTCAAAGTCTTAAAGCGTATAAGAAAAGAAAGGTTGAAACGATGGAACGAGTTTCTCAGATTATGCCGGACGAAAAGCCAAAG  
CCGACACCCGAACAGGAAAAGATGTTTTGAAATTTGCAGGCATACAATTTTATTCTCGCCCTTTTGAAGTATAAATATTCGGGTTCGTTCCG  
AATAGAGCGTGACAGGATAATAAACGAGTCTACATTTGCATACATGGAAAGATTGGGGTATGATATGTCGGTAGTACCGACGTTGGCGGACA  
AGAAAGAAGCTTTGTTTCAATTTCAAGGTAGACCCGTAATAGCTTTGCGCAAATTTTCGAAAAGAGTGTATTTTCGAGATTGGGATAGAC  
CACGAAGCAGTTTATTTTCGTGCGGTACTGATAGCCAAGAAAAGAAAGTTATTCAGTATTGGGATGAAATGTAGCTTTCTCAAATGAAGG  
TGATAGATCAGAAGATAATTTGGAAGTTGACTACTACATTTCAATAAAACCAAAAGTTATGAATAGAAGAAAAGTAAAAAAGAACGGTTA  
TCGGATAAGGCTTACAAAGCCTTCCGATAAATTCGTTTATGCTCTGACTCGTTAACATACGAAAGGAGAAAAGGAGGAAAAGAGATGTT  
ATACTCTGTATTGCAAAATATGCGTCTATTAACATATTTGT





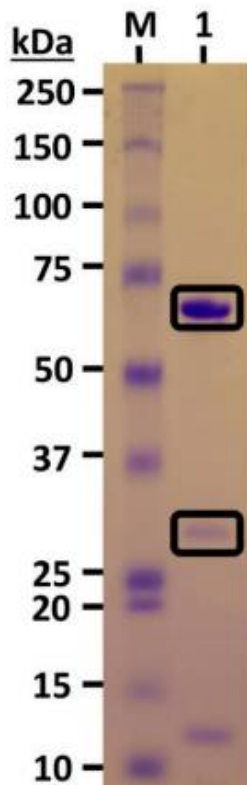

Figure S4. SDS-PAGE analysis of the purified M $\frac{1}{2}$ S MTase. The black boxes highlight the HsdM subunit (upper) and the half HsdS protein (lower). M is a marker lane.

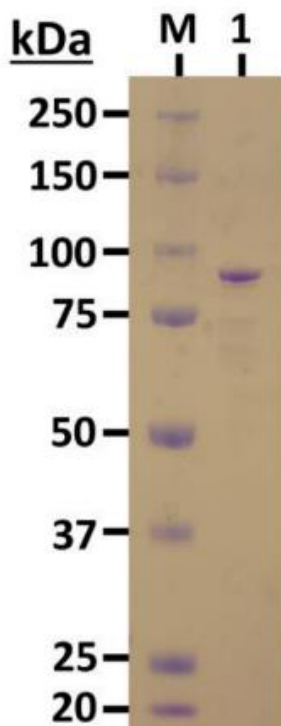

Figure S5. SDS-PAGE analysis of the purified M $\frac{1}{2}$ S<sub>fus</sub> MTase fusion. M is a marker lane.

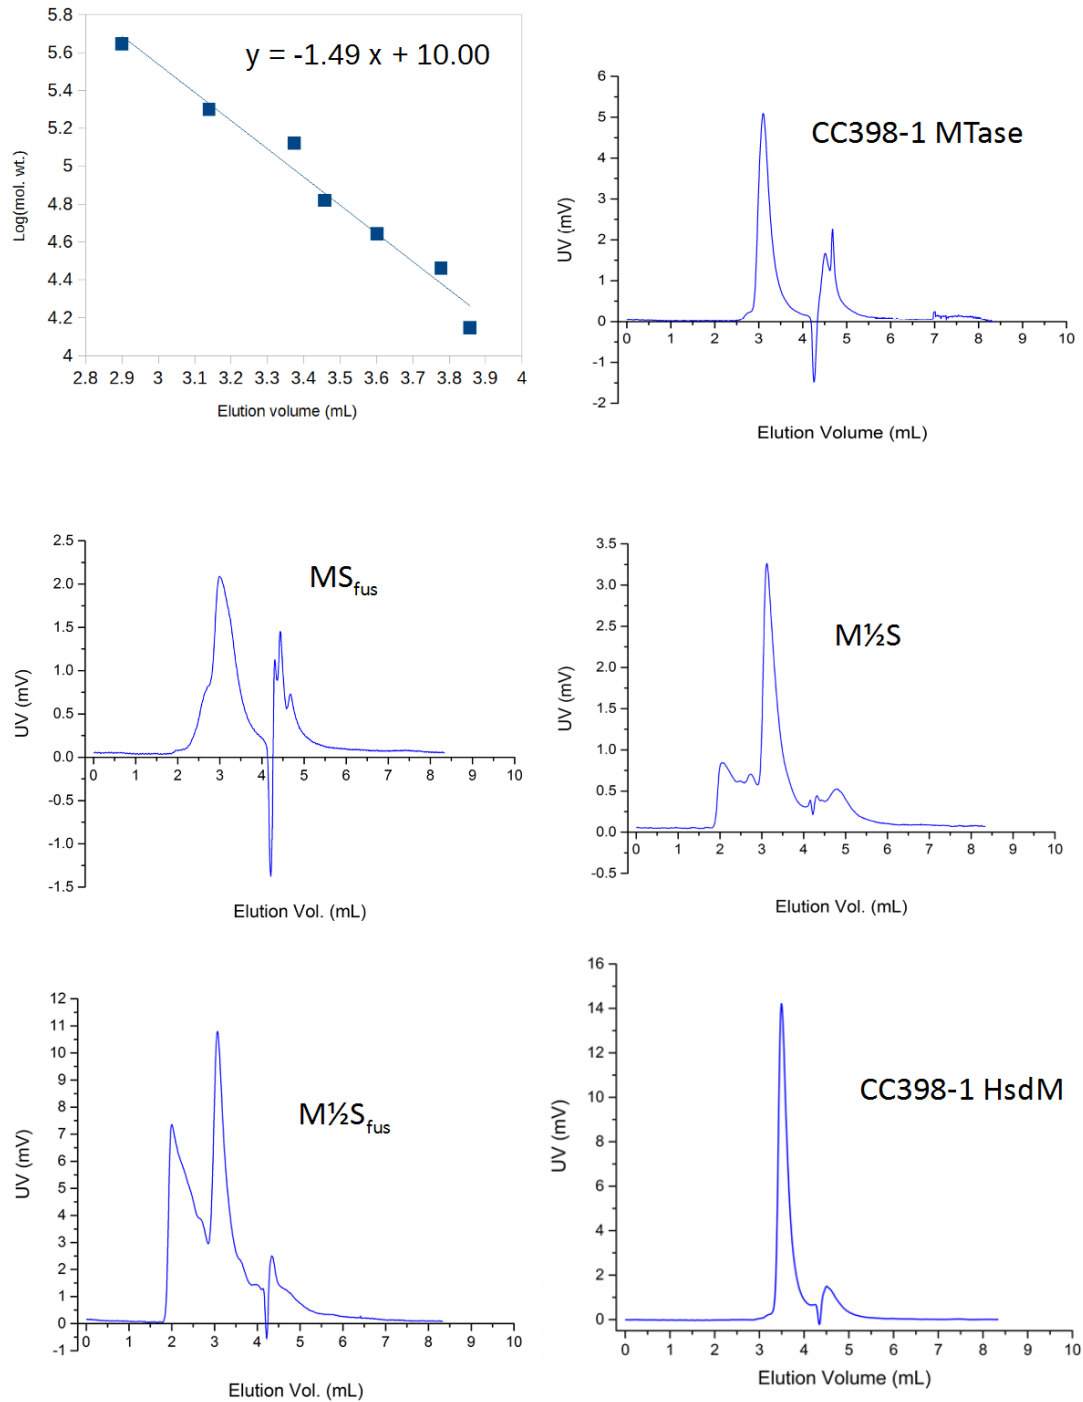

Figure S6. Analytical size exclusion analyses of wild type MTase (CC398-1), the MTase derivatives and the purified HsdM subunit from the CC398-1 RM system (CC398-1 HsdM). In the top left panel from left to right the calibration proteins are apoferritin,  $\beta$ -amylase, bovine serum albumin (dimer), bovine serum albumin (monomer), ovalbumin, carbonic anhydrase,  $\alpha$ -lactalbumin. HPLC gel filtration used a Biosep-SEC-S3000 (30 cm x 0.46 cm) gel filtration column (Phenomenex); 50  $\mu\text{L}$  samples in 20 mM Tris, 20 mM MES, 0.2 M NaCl, 10 mM  $\text{MgCl}_2$ , 7 mM  $\beta$ -mercaptoethanol, and 0.1 mM EDTA, pH 6.5, were injected onto the column. The flow rate was 0.5 mL/min, and detection was at 280 nm. The baseline oscillation at  $\sim 4.3$  minutes in the elution profiles is due to the elution of the small amount of glycerol present in each injected protein sample. Material eluting prior to the main peak at  $\sim 3$  minutes is due to protein aggregation in the injected sample.



Table S5. Molecular weights of main elution peaks from analytical size exclusion chromatography shown in Figure S6.

| Species               | Assumed stoichiometry     | Expected Mol. Wt. (kDa) for assumed stoichiometry | Measured Mol. Wt. (kDa) |
|-----------------------|---------------------------|---------------------------------------------------|-------------------------|
| MTase                 | $M_2S_1$                  | 166                                               | 241                     |
| $M\frac{1}{2}S$       | $(M\frac{1}{2}S)_2$       | 172                                               | 225                     |
| $MS_{fus}$            | $(MS_{fus})_2$            | 213                                               | 325                     |
| $M\frac{1}{2}S_{fus}$ | $(M\frac{1}{2}S_{fus})_2$ | 173                                               | 251                     |
| HsdM                  | $(HsdM)_1$                | 59                                                | 61                      |

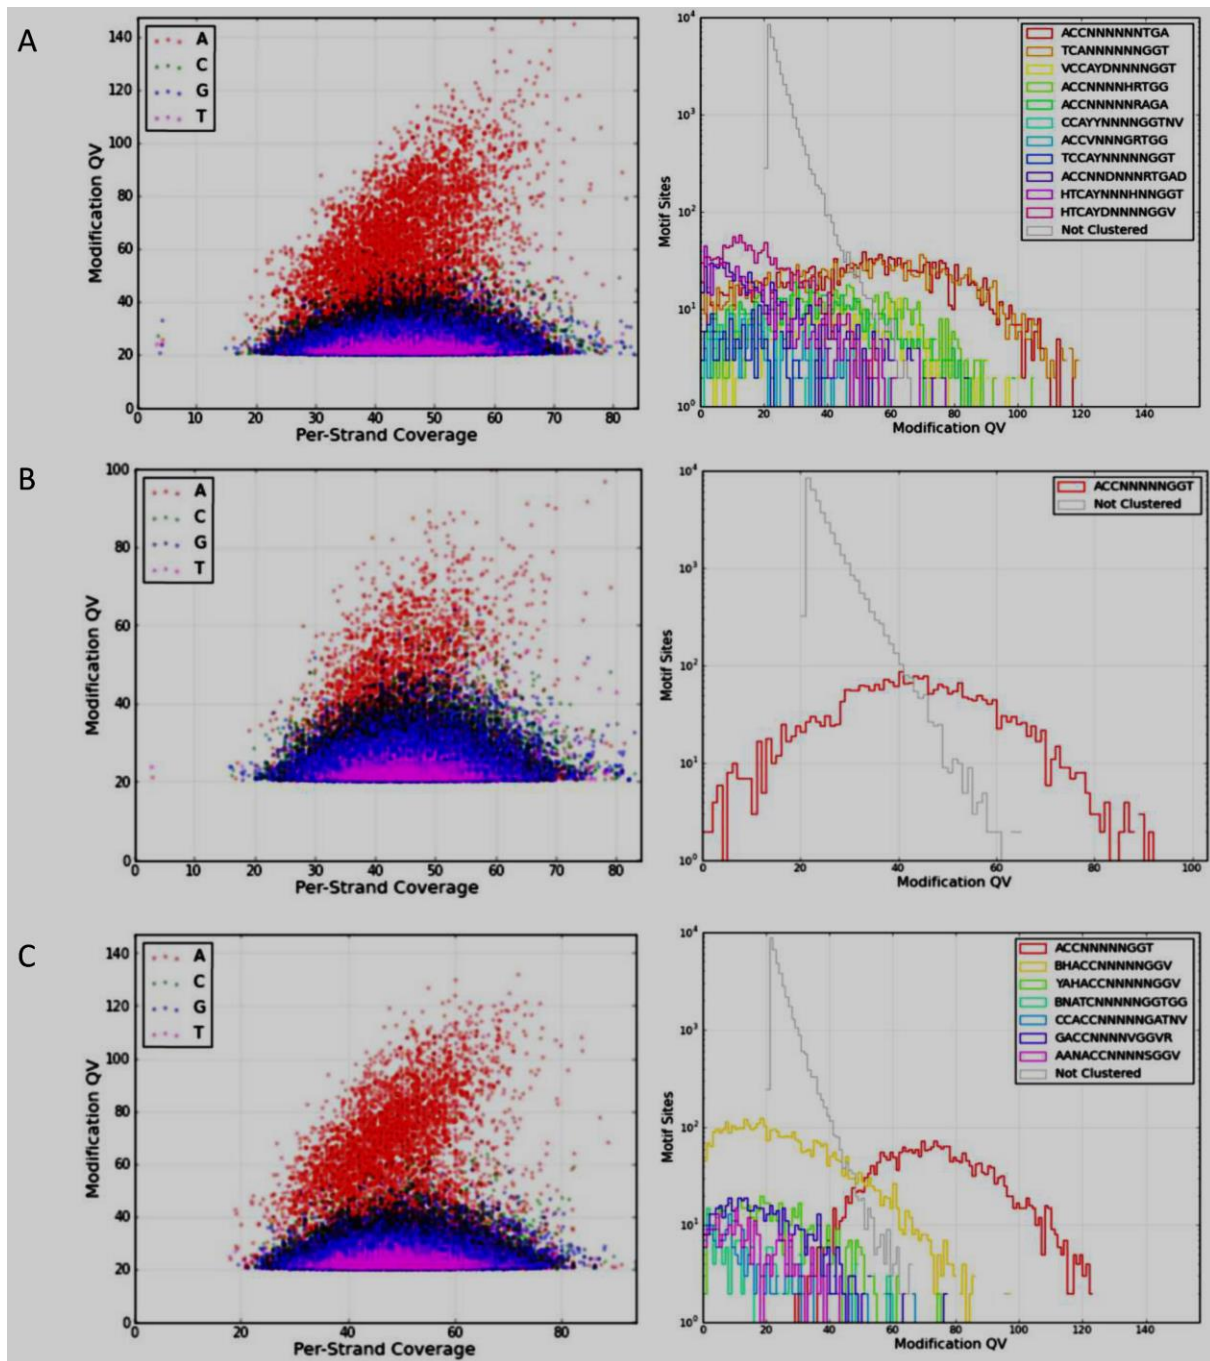

Figure S7. Results from SMRT Sequencing analysis of *E. coli* ER2796 genomic DNA, after modification by the  $MS_{fus}$  MTase (A),  $M_{1/2S}$  MTase (B), and the  $M_{1/2Sfus}$  MTase (C). Graphs on the left-hand side are scatter plots, which show the frequency of detection of specific base modification. For each of the MTases there is a higher frequency of points corresponding to N6-methylated adenine (red) with high quality value (QV). This indicates that the MTases are adenine MTases. The graphs on the right-hand side show the frequency of detection of methylated DNA sequence motifs. Again, in each case the red line shows the methylated motif detected at the highest frequency. In the case of the  $MS_{fus}$  MTase (A), this is the wild-type motif, ACCN<sub>5</sub>RTGA and its complement. For the other two MTases,  $M_{1/2S}$  MTase (B) and the  $M_{1/2Sfus}$  MTase (C), this is the palindromic sequence, ACCN<sub>5</sub>GGT.

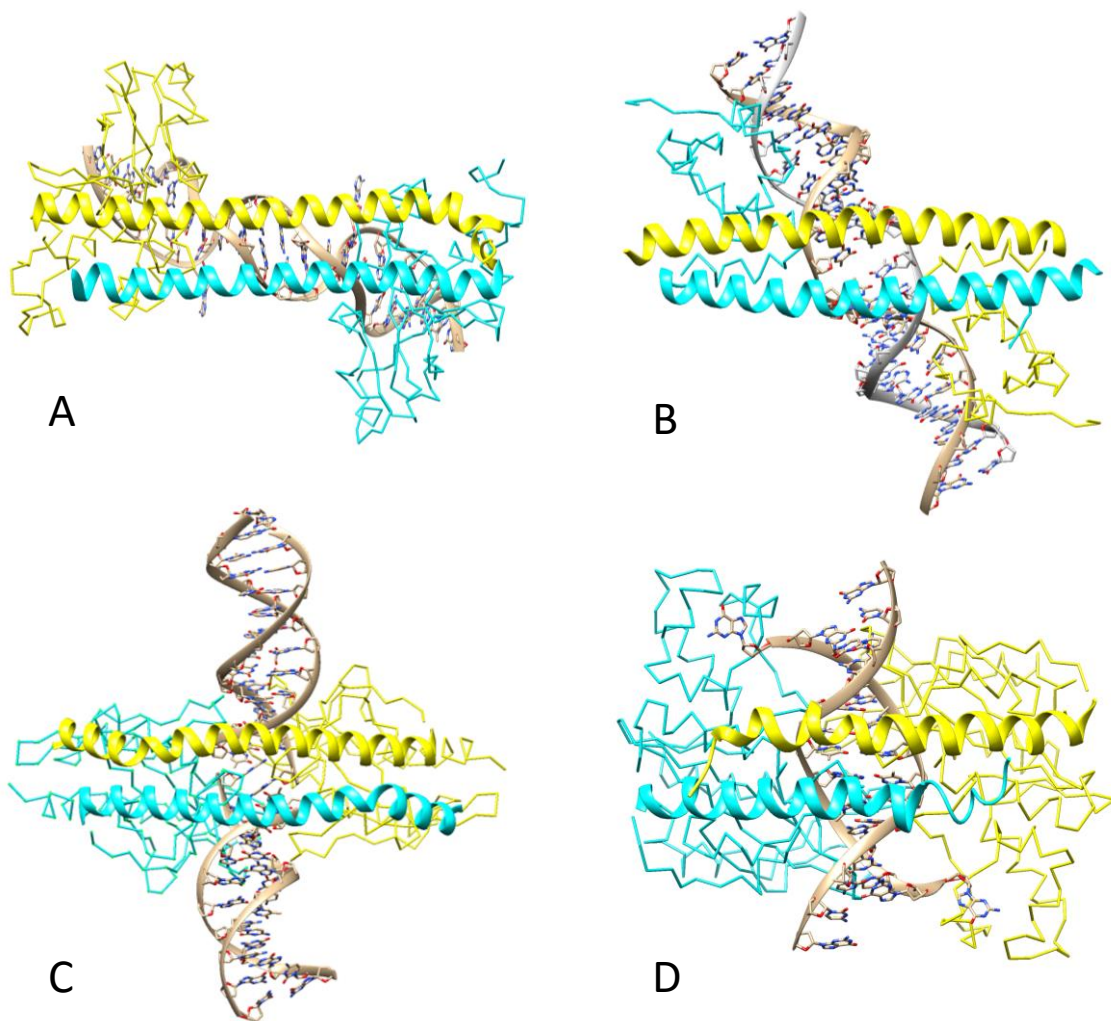

Supplementary figure S8. The angle between the two  $\alpha$  helices (yellow and cyan, one from each protein subunit) and the helical axis of the bound DNA increases as the two parts of the target sequences (and the methylation/cleavage sites) become closer. (A) EcoKI HsdS shown bound to AACNNNNNNGTGC (PDB: 2Y7H, underlined bases are locations for methylation and 8 bp apart, amino acids 1-430 shown). (B) BmrR transcription factor bound to operator DNA containing the internal repeat TCCGGANNNCCGGA (PDB:3D71, amino acids 1-117 shown, DNA sequences only 4 bp apart). (C) SwaI REase bound to DNA containing target ATTT^AAAT (PDB: 5TH3, blunt end cleavage marked by ^, palindromic target has no non-specific bp). (D) HincII REase bound to DNA containing target GTY^RAC (PDB: 2GIE, blunt end cleavage marked by ^, palindromic target has no non-specific bp).
